# Supplementary material for: Effect of seedling size on post-planting growth and survival of five Mexican Pinus species and their hybrids
Source: PeerJ. 2024 Dec 20;12:e18725. doi: 10.7717/peerj.18725 (PMC11665424; doi:10.7717/peerj.18725)
Supplement: Supplemental Information 4 [file peerj-12-18725-s004.xlsx]

## Sheet: raw data
Seedling number	Code	tree species and its hybrids	seedling of pure or hybrid parents	seed provenance	field trial	root collar diameter (RCD, mm)	Height (H, cm)	RCD3 (mm)	H3 (cm)	survival rate (SR)
868	PA C 121 P	PA-P	P	PA C	2	8.5	12			0
31	PA C 121 P	PA-P	P	PA C	1	8.4	10.6			0
21	PA C 13 H	PA-P	P	PA C	1	7.6	6			0
8	PA C 88 P	PA-H	H	PA C	1	6	16			0
35	PA C 88 P	PA-P	P	PA C	1	9.4	5			0
33	PA GI 10 P	PA-H	H	PA GI	1	8.8	10			0
38	PA GI 10 P	PA-P	P	PA GI	1	9.9	6			0
20	PA GI 100 P	PA-H	H	PA GI	1	7.4	12			0
25	PA GI 100 P	PA-H	H	PA GI	1	7.8	10.5			0
4	PA GI 103 P	PA-P	P	PA GI	1	5.3	15.6			0
10	PA GI 122 P	PA-P	P	PA GI	1	6.3	7			0
7	PA GI 16 H	PA-H	H	PA GI	1	5.5	11			0
19	PA GI 16 H	PA-P	P	PA GI	1	7.4	10			0
1	PA GI 22 P	PA-P	P	PA GI	1	2.7	3			0
16	PA GI 22 P	PA-P	P	PA GI	1	6.9	16			0
36	PA GI 22 P	PA-P	P	PA GI	1	9.4	7			0
37	PA GI 22 P	PA-P	P	PA GI	1	9.6	9.5			0
28	PA GI 34 H	PA-P	P	PA GI	1	8.1	8.5			0
32	PA GI 34 H	PA-P	P	PA GI	1	8.5	12			0
18	PA GI 55 P	PA-P	P	PA GI	1	7.2	12			0
30	PA GI 55 P	PA-P	P	PA GI	1	8.3	11	9.6	30	1
13	PA GI 55 P	PA-H	H	PA GI	1	6.5	10			0
24	PA GI 82 P	PA-P	P	PA GI	1	7.8	7			0
866	PA GI 82 P	PA-P	P	PA GI	2	3.4	13	11	18.3	1
14	PA GI 82 P	PA-P	P	PA GI	1	6.5	11			0
29	PA GI 82 P	PA-H	H	PA GI	1	8.3	15	12.5	26.4	1
15	PA GI 88 P	PA-P	P	PA GI	1	6.6	15			0
17	PA GI 88 P	PA-P	P	PA GI	1	6.9	10			0
34	PA GI 88 P	PA-P	P	PA GI	1	9	12			0
5	PA GI 88 P	PA-P	P	PA GI	1	5.4	10			0
12	PA GI 91 H	PA-H	H	PA GI	1	6.5	5			0
22	PA GI 91 H	PA-H	H	PA GI	1	7.7	14			0
23	PA GI 91 H	PA-H	H	PA GI	1	7.7	9			0
11	PA GI 91 H	PA-P	P	PA GI	1	6.4	10			0
26	PA GI 91 H	PA-P	P	PA GI	1	7.8	13			0
867	PA GI 91 H	PA-H	H	PA GI	2	6	16	21.5	16	1
2	PA GI 91 H	PA-H	H	PA GI	1	2.7	3	13.6	18	1
6	PA GI 94 H	PA-P	P	PA GI	1	5.4	12			0
82	PD A 49 H	PD-H	H	PD A	1	7.4	12			0
944	PD A 61 P	PD-P	P	PD A	2	5.5	11	27.2	17.4	1
102	PD A 64 P	PD-H	H	PD A	1	8.1	10			0
80	PD A 1 P	PD-P	P	PD A	1	7.4	9			0
995	PD A 10 P	PD-H	H	PD A	2	7.2	10			0
47	PD A 100 P	PD-P	P	PD A	1	5.3	8			0
39	PD A 100 P	PD-P	P	PD A	1	2.3	11	16.2	21.1	1
89	PD A 100 P	PD-P	P	PD A	1	7.7	9	7.7	25	1
123	PD A 100 P	PD-P	P	PD A	1	9.3	8	12.6	32	1
99	PD A 100 P	PD-P	P	PD A	1	8	7			0
116	PD A 100 P	PD-P	P	PD A	1	8.7	11	11.7	33.6	1
885	PD A 109 H	PD-H	H	PD A	2	4.4	11			0
50	PD A 109 P	PD-P	P	PD A	1	5.6	7	9	25	1
60	PD A 109 P	PD-P	P	PD A	1	6.5	13			0
934	PD A 109 P	PD-P	P	PD A	2	5.3	14.5			0
928	PD A 109 P	PD-P	P	PD A	2	5.2	14	14.3	38.9	1
103	PD A 109 P	PD-P	P	PD A	1	8.1	5			0
48	PD A 118 P	PD-P	P	PD A	1	5.5	7			0
75	PD A 118 P	PD-P	P	PD A	1	7.2	12			0
55	PD A 118 P	PD-P	P	PD A	1	6	7.5	11.7	30.6	1
121	PD A 118 P	PD-P	P	PD A	1	9.3	11	10.16	34.6	1
117	PD A 121 P	PD-P	P	PD A	1	8.8	10			0
77	PD A 14 H	PD-H	H	PD A	1	7.2	9			0
111	PD A 14 P	PD-P	P	PD A	1	8.4	6			0
945	PD A 19 P	PD-P	P	PD A	2	5.5	20			0
65	PD A 19 P	PD-P	P	PD A	1	6.8	12			0
1017	PD A 19 P	PD-P	P	PD A	2	9.4	15	11.4	30	1
1018	PD A 19 P	PD-P	P	PD A	2	9.4	15	9.5	20.7	1
965	PD A 19 P	PD-P	P	PD A	2	5.9	23			0
1008	PD A 19 P	PD-P	P	PD A	2	8.5	11.5			0
912	PD A 19 P	PD-H	H	PD A	2	5	9			0
1038	PD A 21 P	PD-P	P	PD A	2	4.6	9			0
62	PD A 22 P	PD-P	P	PD A	1	6.6	11.5			0
85	PD A 22 P	PD-P	P	PD A	1	7.5	8			0
107	PD A 22 P	PD-P	P	PD A	1	8.2	6			0
968	PD A 22 P	PD-P	P	PD A	2	6	9			0
79	PD A 22 P	PD-P	P	PD A	1	7.4	12	12.1	32	1
112	PD A 25 P	PD-P	P	PD A	1	8.4	11			0
888	PD A 25 P	PD-P	P	PD A	2	4.5	16	14.4	34.3	1
916	PD A 25 P	PD-P	P	PD A	2	5.1	13	14.8	39.2	1
976	PD A 25 P	PD-P	P	PD A	2	6.3	11	13.9	35.3	1
54	PD A 25 P	PD-P	P	PD A	1	5.8	10			0
130	PD A 25 P	PD-P	P	PD A	1	9.9	11			0
954	PD A 26 P	PD-P	P	PD A	2	5.7	17			0
101	PD A 28 P	PD-H	H	PD A	1	8.1	9			0
86	PD A 28 P	PD-P	P	PD A	1	7.6	6			0
90	PD A 28 P	PD-P	P	PD A	1	7.7	9			0
61	PD A 28 P	PD-P	P	PD A	1	6.5	11	7.4	43.6	1
895	PD A 28 P	PD-P	P	PD A	2	4.7	17	14.7	51	1
946	PD A 28 P	PD-P	P	PD A	2	5.5	8	19.6	51.7	1
1019	PD A 28 P	PD-P	P	PD A	2	9.6	9.5	12.5	28.8	1
1021	PD A 28 P	PD-P	P	PD A	2	10	10	14.7	41.6	1
955	PD A 28 P	PD-H	H	PD A	2	5.7	13	12.3	37	1
947	PD A 34 P	PD-P	P	PD A	2	5.5	17	20	47.8	1
897	PD A 42 H	PD-H	H	PD A	2	4.8	26	15.2	50.9	1
119	PD A 46 P	PD-P	P	PD A	1	9.1	11			0
877	PD A 46 P	PD-P	P	PD A	2	4.1	13			0
935	PD A 46 P	PD-P	P	PD A	2	5.3	10			0
985	PD A 46 P	PD-P	P	PD A	2	6.6	14			0
1009	PD A 46 P	PD-P	P	PD A	2	8.6	8			0
134	PD A 46 P	PD-P	P	PD A	1	10	8	11.4	30	1
927	PD A 49 H	PD-H	H	PD A	2	5.2	28	11	37.4	1
957	PD A 49 H	PD-H	H	PD A	2	5.7	20			0
120	PD A 49 H	PD-H	H	PD A	1	9.2	4	10.8	32.1	1
956	PD A 49 H	PD-H	H	PD A	2	5.7	18	16.3	41.6	1
961	PD A 49 H	PD-H	H	PD A	2	5.8	17			0
73	PD A 52 P	PD-P	P	PD A	1	7.2	8			0
106	PD A 52 P	PD-P	P	PD A	1	8.2	14			0
903	PD A 52 P	PD-P	P	PD A	2	4.9	19			0
904	PD A 52 P	PD-P	P	PD A	2	4.9	16			0
53	PD A 55 P	PD-P	P	PD A	1	5.8	10			0
905	PD A 55 P	PD-P	P	PD A	2	4.9	13			0
936	PD A 55 P	PD-P	P	PD A	2	5.3	18			0
972	PD A 55 P	PD-P	P	PD A	2	6.2	19			0
917	PD A 55 P	PD-P	P	PD A	2	5.1	22	9.8	36	1
51	PD A 58 P	PD-P	P	PD A	1	5.7	11			0
88	PD A 58 P	PD-P	P	PD A	1	7.6	6			0
1010	PD A 58 P	PD-P	P	PD A	2	8.9	11			0
46	PD A 61 P	PD-P	P	PD A	1	5.3	4			0
110	PD A 61 P	PD-P	P	PD A	1	8.4	12			0
871	PD A 61 P	PD-P	P	PD A	2	3.5	14			0
898	PD A 61 P	PD-P	P	PD A	2	4.8	16			0
986	PD A 61 P	PD-P	P	PD A	2	6.6	17			0
1013	PD A 61 P	PD-P	P	PD A	2	9.1	11	14.7	36.6	1
96	PD A 61 P	PD-P	P	PD A	1	7.9	12			0
891	PD A 63 P	PD-P	P	PD A	2	4.6	20	9	30	1
71	PD A 64 P	PD-P	P	PD A	1	7	10			0
127	PD A 64 P	PD-P	P	PD A	1	9.8	14			0
889	PD A 64 P	PD-P	P	PD A	2	4.5	6			0
906	PD A 64 P	PD-P	P	PD A	2	4.9	17	9.9	28.2	1
910	PD A 64 P	PD-P	P	PD A	2	5	20	17.5	55	1
97	PD A 67 H	PD-H	H	PD A	1	8	6	11.68	29.8	1
129	PD A 7 H	PD-H	H	PD A	1	9.9	12			0
1004	PD A 7 H	PD-H	H	PD A	2	8.2	9.9			0
87	PD A 7 H	PD-H	H	PD A	1	7.6	12	7.8	27.2	1
878	PD A 7 H	PD-H	H	PD A	2	4.2	20	8.2	31.4	1
74	PD A 7 H	PD-H	H	PD A	1	7.2	9			0
973	PD A 70 P	PD-P	P	PD A	2	6.2	20	26.1	76.5	1
872	PD A 70 P	PD-H	H	PD A	2	3.7	15	14.9	30	1
56	PD A 73 H	PD-H	H	PD A	1	6.1	4.5	12.2	13.3	1
109	PD A 73 H	PD-H	H	PD A	1	8.3	16	12.7	22.2	1
66	PD A 91 P	PD-P	P	PD A	1	6.8	11			0
882	PD A 91 P	PD-P	P	PD A	2	4.3	14			0
907	PD A 91 P	PD-P	P	PD A	2	4.9	17			0
908	PD A 91 P	PD-P	P	PD A	2	4.9	17			0
951	PD A 91 P	PD-P	P	PD A	2	5.6	9			0
958	PD A 91 P	PD-P	P	PD A	2	5.7	17	10.5	28.2	1
72	PD A 94 P	PD-P	P	PD A	1	7.1	6			0
1012	PD A 94 P	PD-P	P	PD A	2	9	6			0
67	PD A 94 P	PD-P	P	PD A	1	6.8	12	11.5	50.2	1
876	PD A 94 P	PD-H	H	PD A	2	4	12			0
42	PD A 94 P	PD-P	P	PD A	1	4.1	5.5			0
44	PD A 94 P	PD-P	P	PD A	1	4.7	5			0
911	PD A 94 P	PD-H	H	PD A	2	5	5	17.7	39.5	1
58	PD A 94 P	PD-P	P	PD A	1	6.3	11	10	29.6	1
899	PD ME 103 H	PD-H	H	PD ME	2	4.8	16	11	27	1
918	PD ME 103 H	PD-H	H	PD ME	2	5.1	20.1	11	39.3	1
929	PD ME 19 H	PD-H	H	PD ME	2	5.2	21	13.5	37.5	1
993	PD ME 10 H	PD-H	H	PD ME	2	7.1	17	18.28	43.4	1
132	PD ME 10 H	PD-H	H	PD ME	1	10	6			0
913	PD ME 10 H	PD-H	H	PD ME	2	5	14			0
940	PD ME 10 H	PD-H	H	PD ME	2	5.4	15.5			0
108	PD ME 10 H	PD-H	H	PD ME	1	8.3	16	13.7	38.6	1
892	PD ME 10 H	PD-H	H	PD ME	2	4.6	13	18.7	41	1
52	PD ME 10 H	PD-H	H	PD ME	1	5.7	7			0
966	PD ME 103 H	PD-H	H	PD ME	2	5.9	20			0
996	PD ME 103 H	PD-H	H	PD ME	2	7.2	8			0
83	PD ME 104 H	PD-H	H	PD ME	1	7.4	12	10.16	25	1
988	PD ME 104 H	PD-H	H	PD ME	2	6.8	16	14.8	25.4	1
41	PD ME 109 H	PD-H	H	PD ME	1	3.8	15			0
76	PD ME 109 H	PD-H	H	PD ME	1	7.2	7			0
94	PD ME 109 H	PD-H	H	PD ME	1	7.9	11.5			0
873	PD ME 109 H	PD-H	H	PD ME	2	3.8	10			0
909	PD ME 109 H	PD-H	H	PD ME	2	4.9	15			0
1014	PD ME 109 H	PD-H	H	PD ME	2	9.2	9			0
70	PD ME 109 H	PD-H	H	PD ME	1	7	8	11.684	55	1
128	PD ME 109 H	PD-H	H	PD ME	1	9.8	10	11.684	48	1
879	PD ME 109 H	PD-H	H	PD ME	2	4.2	18	10.7	26	1
896	PD ME 109 H	PD-H	H	PD ME	2	4.7	16	15.1	44.8	1
919	PD ME 109 H	PD-H	H	PD ME	2	5.1	20	19.3	39.1	1
941	PD ME 109 H	PD-H	H	PD ME	2	5.4	14	14.9	23	1
962	PD ME 109 H	PD-H	H	PD ME	2	5.8	19	26.3	80.6	1
989	PD ME 109 H	PD-H	H	PD ME	2	6.8	12	9.7	19.4	1
992	PD ME 109 H	PD-H	H	PD ME	2	7	18.5	18.3	45.2	1
997	PD ME 109 H	PD-H	H	PD ME	2	7.3	22	17	47.2	1
1005	PD ME 109 H	PD-H	H	PD ME	2	8.2	6	13.2	29.1	1
937	PD ME 109 H	PD-H	H	PD ME	2	5.3	14			0
1002	PD ME 109 H	PD-H	H	PD ME	2	7.8	10.5			0
64	PD ME 112 H	PD-H	H	PD ME	1	6.7	10			0
920	PD ME 112 H	PD-H	H	PD ME	2	5.1	10	14.1	34.9	1
1020	PD ME 112 H	PD-H	H	PD ME	2	9.9	12	11.5	27.9	1
982	PD ME 113 H	PD-H	H	PD ME	2	6.5	13			0
880	PD ME 124 H	PD-H	H	PD ME	2	4.2	19			0
977	PD ME 124 H	PD-H	H	PD ME	2	6.3	7			0
113	PD ME 124 H	PD-H	H	PD ME	1	8.4	6	20	48	1
875	PD ME 124 H	PD-H	H	PD ME	2	3.9	14	13.2	41	1
118	PD ME 13 H	PD-H	H	PD ME	1	8.8	9.2			0
126	PD ME 13 H	PD-H	H	PD ME	1	9.4	15			0
931	PD ME 13 H	PD-H	H	PD ME	2	5.2	16			0
890	PD ME 13 H	PD-H	H	PD ME	2	4.5	12.1	8.5	21.2	1
893	PD ME 13 H	PD-H	H	PD ME	2	4.6	9	14.3	28.1	1
930	PD ME 13 H	PD-H	H	PD ME	2	5.2	15.6	10.3	20.5	1
1015	PD ME 13 H	PD-H	H	PD ME	2	9.2	12	20.2	28.3	1
914	PD ME 13 H	PD-H	H	PD ME	2	5	15.5	15	16	1
990	PD ME 19 H	PD-H	H	PD ME	2	6.8	17	20.1	37	1
115	PD ME 28 H	PD-H	H	PD ME	1	8.7	10			0
133	PD ME 28 H	PD-H	H	PD ME	1	10	10			0
978	PD ME 28 H	PD-H	H	PD ME	2	6.3	17			0
1011	PD ME 28 H	PD-H	H	PD ME	2	8.9	10	14.7	37.2	1
870	PD ME 28 H	PD-H	H	PD ME	2	3.3	11	11.6	19.3	1
1539	PD ME 31 P	PD-P	P	PD ME	2	9	17	24.7	20.6	1
114	PD ME 4 H	PD-H	H	PD ME	1	8.6	11			0
125	PD ME 4 H	PD-H	H	PD ME	1	9.4	7			0
881	PD ME 4 H	PD-H	H	PD ME	2	4.2	12			0
942	PD ME 4 H	PD-H	H	PD ME	2	5.4	7			0
979	PD ME 4 H	PD-H	H	PD ME	2	6.3	12			0
1007	PD ME 4 H	PD-H	H	PD ME	2	8.4	11			0
900	PD ME 4 H	PD-H	H	PD ME	2	4.8	18	17.2	40	1
921	PD ME 4 H	PD-H	H	PD ME	2	5.1	17	17.7	31.2	1
938	PD ME 4 H	PD-H	H	PD ME	2	5.3	15	16.7	47.6	1
971	PD ME 4 H	PD-H	H	PD ME	2	6.1	13	8.9	36.7	1
92	PD ME 4 H	PD-H	H	PD ME	1	7.8	13			0
922	PD ME 4 H	PD-H	H	PD ME	2	5.1	23			0
81	PD ME 43 H	PD-H	H	PD ME	1	7.4	6			0
122	PD ME 43 H	PD-H	H	PD ME	1	9.3	8			0
137	PD ME 43 H	PD-H	H	PD ME	1	12.6	9			0
983	PD ME 43 H	PD-H	H	PD ME	2	6.5	28			0
886	PD ME 43 H	PD-H	H	PD ME	2	4.4	17	25.6	38	1
68	PD ME 43 H	PD-H	H	PD ME	1	6.8	7			0
1003	PD ME 43 H	PD-H	H	PD ME	2	8.1	8	11.6	30	1
93	PD ME 52 H	PD-H	H	PD ME	1	7.8	14			0
943	PD ME 52 H	PD-H	H	PD ME	2	5.4	16	24	34	1
969	PD ME 52 H	PD-H	H	PD ME	2	6	20	16.3	36	1
43	PD ME 55 H	PD-H	H	PD ME	1	4.7	5			0
98	PD ME 55 H	PD-H	H	PD ME	1	8	8			0
1016	PD ME 55 H	PD-H	H	PD ME	2	9.2	7			0
1000	PD ME 57 H	PD-H	H	PD ME	2	7.6	9.9			0
970	PD ME 58 H	PD-H	H	PD ME	2	6.1	21.5	12	28	1
95	PD ME 58 H	PD-H	H	PD ME	1	7.9	17			0
874	PD ME 58 H	PD-H	H	PD ME	2	3.8	15			0
78	PD ME 58 H	PD-H	H	PD ME	1	7.3	7	7	8.9	1
887	PD ME 58 H	PD-H	H	PD ME	2	4.4	13	13.1	24	1
980	PD ME 58 H	PD-H	H	PD ME	2	6.3	12.5	23	16	1
1001	PD ME 58 H	PD-H	H	PD ME	2	7.7	10	14.2	37.1	1
974	PD ME 58 H	PD-H	H	PD ME	2	6.2	6			0
105	PD ME 67 H	PD-H	H	PD ME	1	8.2	5			0
45	PD ME 67 H	PD-H	H	PD ME	1	4.8	8			0
923	PD ME 67 H	PD-H	H	PD ME	2	5.1	20	11.4	30.2	1
925	PD ME 67 H	PD-H	H	PD ME	2	5.1	6			0
136	PD ME 67 H	PD-H	H	PD ME	1	11	9.5	10	34.2	1
894	PD ME 7 H	PD-H	H	PD ME	2	4.7	14	8.4	29	1
57	PD ME 85 H	PD-H	H	PD ME	1	6.1	4.5			0
63	PD ME 85 H	PD-H	H	PD ME	1	6.6	9			0
901	PD ME 85 H	PD-H	H	PD ME	2	4.8	12			0
902	PD ME 85 H	PD-H	H	PD ME	2	4.8	8			0
959	PD ME 85 H	PD-H	H	PD ME	2	5.7	22			0
975	PD ME 85 H	PD-H	H	PD ME	2	6.2	18			0
100	PD ME 85 H	PD-P	P	PD ME	1	8.1	9			0
59	PD ME 85 H	PD-H	H	PD ME	1	6.5	5	10.3	54	1
135	PD ME 85 H	PD-H	H	PD ME	1	10.6	11.5	19.8	49.8	1
933	PD ME 85 H	PD-H	H	PD ME	2	5.3	14	10.3	25	1
924	PD ME 91 H	PD-H	H	PD ME	2	5.1	15			0
932	PD ME 91 H	PD-H	H	PD ME	2	5.2	19			0
967	PD ME 91 H	PD-H	H	PD ME	2	5.9	17			0
915	PD ME 91 H	PD-H	H	PD ME	2	5	12	10	30.2	1
948	PD ME 91 H	PD-H	H	PD ME	2	5.5	15	9.9	23.2	1
952	PD ME 91 H	PD-H	H	PD ME	2	5.6	8	16.7	34	1
984	PD ME 91 H	PD-H	H	PD ME	2	6.5	20	35.1	15.2	1
953	PD ME 93 H	PD-H	H	PD ME	2	5.6	6	15.4	29.8	1
49	PD P 106 P	PD-P	P	PD P	1	5.5	7			0
949	PD P 106 P	PD-P	P	PD P	2	5.5	24			0
884	PD P 109 P	PD-P	P	PD P	2	4.3	16			0
991	PD P 109 P	PD-P	P	PD P	2	6.8	6.5			0
950	PD P 109 P	PD-P	P	PD P	2	5.5	7			0
939	PD P 109 P	PD-H	H	PD P	2	5.3	14			0
124	PD P 109 P	PD-P	P	PD P	1	9.3	11	13.2	44.1	1
40	PD P 110 H	PD-H	H	PD P	1	2.7	3			0
84	PD P 110 H	PD-H	H	PD P	1	7.5	11			0
926	PD P 110 H	PD-H	H	PD P	2	5.1	24			0
131	PD P 110 H	PD-H	H	PD P	1	10	6	8	27	1
981	PD P 110 H	PD-H	H	PD P	2	6.3	20	26.8	65.5	1
69	PD P 110 H	PD-H	H	PD P	1	7	5			0
104	PD P 110 H	PD-P	P	PD P	1	8.1	10			0
987	PD P 118 H	PD-H	H	PD P	2	6.7	18.4			0
1006	PD P 12 H	PD-H	H	PD P	2	8.3	15	11	31.5	1
869	PD P 121 H	PD-H	H	PD P	2	2	5			0
998	PD P 19 P	PD-P	P	PD P	2	7.3	20			0
539	PD P 40 H	PD-H	H	PD P	1	9.4	5			0
1079	PE M 19 H	PE-H	H	PE M	2	5.3	15.6	21	16	1
594	PE M 103 H	PE-H	H	PE M	1	12.6	9			0
212	PE M 118 P	PE-P	P	PE M	1	6	10			0
1031	PE M 46 P	PE-P	P	PE M	2	4	10			0
162	PE M 46 P	PE-P	P	PE M	1	4.9	10			0
1594	PE M 58 H	PE-H	H	PE M	2	10	6	42.1	11	1
1568	PE M 58 P	PE-P	P	PE M	2	9.5	11	12.5	14.5	1
1451	PE M 77 P	PE-P	P	PE M	2	8.1	11			0
1543	PE M 94 H	PE-H	H	PE M	2	9.1	11	20.8	15.6	1
1582	PE MM 100 H	PE-H	H	PE MM	2	9.9	8.5			0
1426	PE MM 103 H	PE-H	H	PE MM	2	7.9	17			0
241	PE MM 10 H	PE-H	H	PE MM	1	6.4	8			0
513	PE MM 10 H	PE-H	H	PE MM	1	9	12			0
577	PE MM 10 H	PE-H	H	PE MM	1	10.4	13			0
1111	PE MM 10 H	PE-H	H	PE MM	2	5.7	14			0
1339	PE MM 10 H	PE-H	H	PE MM	2	7.4	10	29.2	23	1
1340	PE MM 10 H	PE-H	H	PE MM	2	7.4	14	19.9	21.8	1
1395	PE MM 10 H	PE-H	H	PE MM	2	7.7	9	24	14.7	1
1516	PE MM 10 H	PE-H	H	PE MM	2	8.8	7	21	12.3	1
267	PE MM 10 H	PE-H	H	PE MM	1	6.5	13	20.1	12.5	1
1088	PE MM 10 P	PE-P	P	PE MM	2	5.4	18	7.2	28	1
247	PE MM 100 H	PE-H	H	PE MM	1	6.5	5			0
358	PE MM 100 H	PE-H	H	PE MM	1	7.3	10			0
569	PE MM 100 H	PE-H	H	PE MM	1	9.9	8.5	16.8	11.8	1
1069	PE MM 100 H	PE-H	H	PE MM	2	5.2	8	18.9	11	1
1089	PE MM 100 H	PE-H	H	PE MM	2	5.4	9	15.6	13.2	1
1302	PE MM 100 H	PE-H	H	PE MM	2	7.1	9	34.4	18.2	1
146	PE MM 103 H	PE-H	H	PE MM	1	3.8	15			0
246	PE MM 103 H	PE-H	H	PE MM	1	6.5	5			0
435	PE MM 103 H	PE-H	H	PE MM	1	7.8	13			0
1112	PE MM 103 H	PE-H	H	PE MM	2	5.7	11			0
1373	PE MM 103 H	PE-H	H	PE MM	2	7.6	7			0
1228	PE MM 103 H	PE-H	H	PE MM	2	6.6	15	23	14.3	1
1310	PE MM 103 H	PE-H	H	PE MM	2	7.2	9	12.1	11.6	1
1544	PE MM 103 H	PE-H	H	PE MM	2	9.2	4	21.4	12.5	1
388	PE MM 103 H	PE-H	H	PE MM	1	7.5	8			0
593	PE MM 103 H	PE-H	H	PE MM	1	12.1	9			0
1341	PE MM 109 P	PE-P	P	PE MM	2	7.4	6	26	23.9	1
324	PE MM 112 P	PE-P	P	PE MM	1	7	11	13.1	9.8	1
592	PE MM 112 P	PE-P	P	PE MM	1	12.1	9	8.4	14.2	1
1440	PE MM 112 P	PE-P	P	PE MM	2	8	17.5	24.5	28	1
403	PE MM 112 P	PE-P	P	PE MM	1	7.6	12			0
1595	PE MM 112P	PE-P	P	PE MM	2	10	21			0
1427	PE MM 12 P	PE-P	P	PE MM	2	7.9	10			0
1396	PE MM 124 H	PE-H	H	PE MM	2	7.7	13			0
230	PE MM 127 H	PE-H	H	PE MM	1	6.3	9			0
1027	PE MM 127 H	PE-H	H	PE MM	2	3.8	15	10.1	12.8	1
1452	PE MM 127 H	PE-H	H	PE MM	2	8.1	5	29.8	11.2	1
317	PE MM 127 H	PE-H	H	PE MM	1	6.9	10			0
1141	PE MM 13 H	PE-H	H	PE MM	2	6	7.5	20	14	1
1612	PE MM 13 H	PE-H	H	PE MM	2	10.4	6			0
198	PE MM 13 H	PE-H	H	PE MM	1	5.7	14	26.9	23	1
1545	PE MM 13 H	PE-H	H	PE MM	2	9.2	4.5	20.3	13	1
1610	PE MM 13 P	PE-P	P	PE MM	2	10.3	9.1			0
1602	PE MM 13 P	PE-P	P	PE MM	2	10.1	11	18.4	13.2	1
278	PE MM 14 H	PE-H	H	PE MM	1	6.6	7			0
184	PE MM 149 H	PE-P	P	PE MM	1	5.4	10			0
1080	PE MM 15 H	PE-H	H	PE MM	2	5.3	8			0
1428	PE MM 15 P	PE-P	P	PE MM	2	7.9	9			0
370	PE MM 16 H	PE-H	H	PE MM	1	7.4	12			0
446	PE MM 16 H	PE-H	H	PE MM	1	8	13			0
489	PE MM 16 H	PE-H	H	PE MM	1	8.6	11			0
581	PE MM 16 H	PE-H	H	PE MM	1	10.6	9			0
583	PE MM 16 H	PE-H	H	PE MM	1	11	9.5			0
1358	PE MM 16 H	PE-H	H	PE MM	2	7.5	8			0
1070	PE MM 16 H	PE-H	H	PE MM	2	5.2	6	26.3	11	1
1151	PE MM 16 H	PE-H	H	PE MM	2	6.1	13	29.2	22.3	1
1152	PE MM 16 H	PE-H	H	PE MM	2	6.1	13	15.9	20	1
1160	PE MM 16 H	PE-H	H	PE MM	2	6.2	11.6	8.4	13.4	1
1311	PE MM 16 H	PE-H	H	PE MM	2	7.2	12	27.3	17.2	1
1328	PE MM 16 H	PE-H	H	PE MM	2	7.3	12	27.9	18	1
1374	PE MM 16 H	PE-H	H	PE MM	2	7.6	10	19	15.8	1
1397	PE MM 16 H	PE-H	H	PE MM	2	7.7	10	28.3	15.3	1
1484	PE MM 16 H	PE-H	H	PE MM	2	8.4	10.6	31.3	11.2	1
1508	PE MM 16 H	PE-H	H	PE MM	2	8.7	12	23	30	1
1453	PE MM 16 H	PE-H	H	PE MM	2	8.1	10			0
1253	PE MM 16 H	PE-H	H	PE MM	2	6.8	12	21	12.3	1
195	PE MM 16 P	PE-P	P	PE MM	1	5.7	12			0
326	PE MM 16 P	PE-P	P	PE MM	1	7	8			0
1551	PE MM 19 H	PE-H	H	PE MM	2	9.3	11	31.1	28.7	1
1641	PE MM 19 H	PE-H	H	PE MM	2	12.6	11	23.2	18.9	1
1331	PE MM 19 H	PE-H	H	PE MM	2	7.3	10			0
1342	PE MM 19 P	PE-P	P	PE MM	2	7.4	15			0
1615	PE MM 19 P	PE-P	P	PE MM	2	10.5	14.3			0
1207	PE MM 19 P	PE-P	P	PE MM	2	6.5	5	24.8	17.9	1
1546	PE MM 19 P	PE-P	P	PE MM	2	9.2	5	18.6	12.1	1
156	PE MM 19 P	PE-P	P	PE MM	1	4.7	5	19.6	12.9	1
1626	PE MM 19 P	PE-P	P	PE MM	2	11.1	10	22.2	6	1
1583	PE MM 197 H	PE-H	H	PE MM	2	9.9	10.5			0
1254	PE MM 1OO H	PE-H	H	PE MM	2	6.8	12			0
568	PE MM 2 37 P	PE-P	P	PE MM	1	9.9	11	27.1	7.4	1
145	PE MM 22 H	PE-H	H	PE MM	1	3.8	15			0
256	PE MM 22 H	PE-H	H	PE MM	1	6.5	10			0
269	PE MM 22 H	PE-H	H	PE MM	1	6.6	7			0
1142	PE MM 22 H	PE-H	H	PE MM	2	6	16			0
1153	PE MM 22 H	PE-H	H	PE MM	2	6.1	4.5			0
341	PE MM 22 H	PE-H	H	PE MM	1	7.2	9	6.9	13.2	1
1271	PE MM 22 H	PE-H	H	PE MM	2	6.9	10	32.7	18.1	1
1359	PE MM 22 H	PE-H	H	PE MM	2	7.5	8	27.5	20.2	1
1526	PE MM 22 H	PE-H	H	PE MM	2	8.9	11	29.6	14	1
1049	PE MM 23 H	PE-H	H	PE MM	2	4.9	10			0
210	PE MM 31 H	PE-H	H	PE MM	1	6	9			0
238	PE MM 31 H	PE-H	H	PE MM	1	6.4	15.5			0
279	PE MM 31 H	PE-H	H	PE MM	1	6.6	6			0
343	PE MM 31 H	PE-H	H	PE MM	1	7.2	14			0
1098	PE MM 31 H	PE-H	H	PE MM	2	5.5	11			0
1242	PE MM 31 H	PE-H	H	PE MM	2	6.7	10			0
1343	PE MM 31 H	PE-H	H	PE MM	2	7.4	12	27.7	16.5	1
1517	PE MM 31 H	PE-H	H	PE MM	2	8.8	10	24.2	19.8	1
188	PE MM 31 H	PE-H	H	PE MM	1	5.5	8			0
1050	PE MM 37 P	PE-P	P	PE MM	2	4.9	6			0
1527	PE MM 37 P	PE-P	P	PE MM	2	8.9	9			0
333	PE MM 37 P	PE-P	P	PE MM	1	7	11	24.9	7.5	1
372	PE MM 37 P	PE-P	P	PE MM	1	7.4	6	10.16	17	1
1255	PE MM 37 P	PE-P	P	PE MM	2	6.8	7	17.7	10	1
1627	PE MM 37 P	PE-P	P	PE MM	2	11.1	6	22.3	11.3	1
1260	PE MM 37 P	PE-P	P	PE MM	2	6.8	8			0
237	PE MM 37 P	PE-P	P	PE MM	1	6.3	9			0
1034	PE MM 37 P	PE-P	P	PE MM	2	4.2	15			0
1454	PE MM 37 P	PE-P	P	PE MM	2	8.1	13			0
354	PE MM 37 P	PE-P	P	PE MM	1	7.2	9	25	11	1
431	PE MM 37 P	PE-P	P	PE MM	1	7.7	9	22	16.4	1
242	PE MM 4 H	PE-H	H	PE MM	1	6.4	10			0
1208	PE MM 4 H	PE-H	H	PE MM	2	6.5	13			0
1287	PE MM 4 H	PE-H	H	PE MM	2	7	11			0
1090	PE MM 4 H	PE-H	H	PE MM	2	5.4	9	25	13.8	1
1398	PE MM 4 H	PE-H	H	PE MM	2	7.7	9	14	11.2	1
464	PE MM 4 H	PE-H	H	PE MM	1	8.2	9.9			0
1125	PE MM 4 H	PE-H	H	PE MM	2	5.8	10	11.2	12.5	1
1575	PE MM 40 P	PE-P	P	PE MM	2	9.7	9			0
1498	PE MM 40 P	PE-P	P	PE MM	2	8.6	7	23.2	11.2	1
1081	PE MM 40 P	PE-P	P	PE MM	2	5.3	7			0
1103	PE MM 40 P	PE-P	P	PE MM	2	5.6	10			0
1209	PE MM 40 P	PE-P	P	PE MM	2	6.5	9			0
1065	PE MM 40 P	PE-P	P	PE MM	2	5.1	11	11.6	13	1
1143	PE MM 40 P	PE-P	P	PE MM	2	6	8	20.3	10.8	1
1378	PE MM 41 H	PE-H	H	PE MM	2	7.6	9.9			0
573	PE MM 44 H	PE-H	H	PE MM	1	10	8			0
174	PE MM 49 H	PE-H	H	PE MM	1	5.3	15.6	9	16	1
421	PE MM 49 H	PE-H	H	PE MM	1	7.7	10	23.6	20.5	1
491	PE MM 49 H	PE-H	H	PE MM	1	8.6	11	28	16.5	1
1082	PE MM 49 H	PE-H	H	PE MM	2	5.3	5	11.4	4.4	1
1193	PE MM 49 H	PE-H	H	PE MM	2	6.4	8	19.8	15.9	1
1538	PE MM 49 H	PE-H	H	PE MM	2	9	12	35.6	21.4	1
1596	PE MM 49 H	PE-H	H	PE MM	2	10	8	33.6	15.2	1
633	PE MM 49 H	PE-H	H	PE MM	1	6	16			0
1584	PE MM 49 H	PE-H	H	PE MM	2	9.9	14			0
1475	PE MM 51 H	PE-H	H	PE MM	2	8.3	15			0
175	PE MM 52 H	PE-H	H	PE MM	1	5.3	4			0
575	PE MM 52 H	PE-H	H	PE MM	1	10.1	15			0
1509	PE MM 52 H	PE-H	H	PE MM	2	8.7	11	11.8	12.3	1
1464	PE MM 52 H	PE-H	H	PE MM	2	8.2	9.9			0
266	PE MM 52 H	PE-H	H	PE MM	1	6.5	10	17.8	12.1	1
1399	PE MM 52 H	PE-H	H	PE MM	2	7.7	11.5	27.8	14.1	1
517	PE MM 55 H	PE-H	H	PE MM	1	9.1	14	6.4	13.6	1
1177	PE MM 55 H	PE-H	H	PE MM	2	6.3	9	18.7	14.2	1
1375	PE MM 55 H	PE-H	H	PE MM	2	7.6	7	15.7	11.6	1
1400	PE MM 55 H	PE-H	H	PE MM	2	7.7	9	25.8	14.7	1
1409	PE MM 55 H	PE-H	H	PE MM	2	7.8	7	26.8	12.7	1
1494	PE MM 55 H	PE-H	H	PE MM	2	8.5	12	28	16.3	1
187	PE MM 61 H	PE-H	H	PE MM	1	5.5	11			0
457	PE MM 61 H	PE-H	H	PE MM	1	8.1	9			0
252	PE MM 61 H	PE-H	H	PE MM	1	6.5	10	18.9	10	1
1028	PE MM 61 H	PE-H	H	PE MM	2	3.8	15	24.6	13.2	1
1099	PE MM 61 H	PE-H	H	PE MM	2	5.5	11	21.1	12.8	1
1178	PE MM 61 H	PE-H	H	PE MM	2	6.3	7	24.2	16	1
1288	PE MM 61 H	PE-H	H	PE MM	2	7	5	44.7	20.7	1
1441	PE MM 61 H	PE-H	H	PE MM	2	8	13	36.9	18	1
1485	PE MM 61 H	PE-H	H	PE MM	2	8.4	11	26	22	1
1562	PE MM 61 H	PE-H	H	PE MM	2	9.4	7	23.4	11.2	1
1154	PE MM 61 H	PE-H	H	PE MM	2	6.1	4.5	27.3	14	1
1547	PE MM 61 H	PE-H	H	PE MM	2	9.2	4	35.5	9.2	1
155	PE MM 69 H	PE-H	H	PE MM	1	4.6	4			0
171	PE MM 69 H	PE-H	H	PE MM	1	5.2	6			0
548	PE MM 69 H	PE-H	H	PE MM	1	9.6	9.5			0
1344	PE MM 69 H	PE-H	H	PE MM	2	7.4	6			0
1518	PE MM 69 H	PE-H	H	PE MM	2	8.8	10			0
547	PE MM 69 H	PE-H	H	PE MM	1	9.6	9.5	31.5	6.5	1
1243	PE MM 69 H	PE-H	H	PE MM	2	6.7	10	20	16	1
1455	PE MM 69 H	PE-H	H	PE MM	2	8.1	8.5	26	11	1
1524	PE MM 69 H	PE-H	H	PE MM	2	8.9	3	32	8	1
1552	PE MM 69 H	PE-H	H	PE MM	2	9.3	6	30.4	9	1
466	PE MM 7 P	PE-P	P	PE MM	1	8.2	9.9			0
193	PE MM 7 P	PE-P	P	PE MM	1	5.6	6	13.97	15	1
362	PE MM 7 P	PE-P	P	PE MM	1	7.3	10	19.1	15.4	1
1113	PE MM 7 P	PE-P	P	PE MM	2	5.7	10	19	15.2	1
222	PE MM 7 P	PE-P	P	PE MM	1	6.1	4.5			0
994	PE MM 70 H	PE-H	H	PE MM	2	7.1	12	21	13.4	1
301	PE MM 70 H	PE-H	H	PE MM	1	6.8	11			0
478	PE MM 70 H	PE-H	H	PE MM	1	8.4	12			0
1104	PE MM 70 H	PE-H	H	PE MM	2	5.6	6			0
1155	PE MM 70 H	PE-H	H	PE MM	2	6.1	13			0
386	PE MM 70 H	PE-H	H	PE MM	1	7.5	8	14.2	13.4	1
1987	PE MM 70 H	PE-H	H	PE MM	2	8	10	41.2	20.3	1
1510	PE MM 72 P	PE-P	P	PE MM	2	8.7	12	26.3	19.3	1
316	PE MM 73 P	PE-P	P	PE MM	1	6.9	10			0
442	PE MM 73 P	PE-P	P	PE MM	1	7.9	12			0
460	PE MM 73 P	PE-P	P	PE MM	1	8.1	9			0
545	PE MM 73 P	PE-P	P	PE MM	1	9.5	8			0
1574	PE MM 73 P	PE-P	P	PE MM	2	9.6	6.5			0
1083	PE MM 73 P	PE-P	P	PE MM	2	5.3	7	12.9	9.1	1
1161	PE MM 73 P	PE-P	P	PE MM	2	6.2	8	23.2	16	1
1194	PE MM 73 P	PE-P	P	PE MM	2	6.4	3	32.5	5	1
1345	PE MM 73 P	PE-P	P	PE MM	2	7.4	10	18.6	8.9	1
1360	PE MM 73 P	PE-P	P	PE MM	2	7.5	6	25	10.8	1
141	PE MM 73 P	PE-P	P	PE MM	1	2.7	3			0
1410	PE MM 73 P	PE-P	P	PE MM	2	7.8	15			0
472	PE MM 73 P	PE-P	P	PE MM	1	8.3	16	17	23	1
1156	PE MM 73 P	PE-P	P	PE MM	2	6.1	6	18.1	7.6	1
1465	PE MM 73 P	PE-P	P	PE MM	2	8.2	8.5	20.5	11.6	1
1091	PE MM 75 P	PE-P	P	PE MM	2	5.4	5	22.9	10.5	1
1210	PE MM 75 P	PE-P	P	PE MM	2	6.5	10	25.3	17.1	1
1621	PE MM 7M P	PE-P	P	PE MM	2	10.9	12	22.7	16.8	1
1597	PE MM 82 HP	PE-P	P	PE MM	2	10	13	43	27.5	1
298	PE MM 82 P	PE-P	P	PE MM	1	6.8	11			0
524	PE MM 82 P	PE-P	P	PE MM	1	9.2	9			0
1179	PE MM 82 P	PE-P	P	PE MM	2	6.3	10			0
1289	PE MM 82 P	PE-P	P	PE MM	2	7	8			0
1429	PE MM 82 P	PE-P	P	PE MM	2	7.9	9	30.7	12	1
1430	PE MM 82 P	PE-P	P	PE MM	2	7.9	10	25.7	14.4	1
1123	PE MM 82 P	PE-P	P	PE MM	2	5.8	6			0
360	PE MM 82 P	PE-P	P	PE MM	1	7.3	10			0
1071	PE MM 82 P	PE-P	P	PE MM	2	5.2	7	25.2	16.7	1
1466	PE MM 82 P	PE-P	P	PE MM	2	8.2	11	27.2	20.4	1
1256	PE MM 88 H	PE-H	H	PE MM	2	6.8	11	18.5	8.1	1
1569	PE MM 88 H	PE-H	H	PE MM	2	9.5	11	23.2	15.2	1
1257	PE MM 88 H	PE-H	H	PE MM	2	6.8	6.5	26	9.4	1
437	PE MM 91	PE-P	P	PE MM	1	7.8	7			0
1036	PE MM 91 H	PE-H	H	PE MM	2	4.3	6	32.7	11.6	1
1290	PE MM 91 H	PE-H	H	PE MM	2	7	6	38.2	14.4	1
201	PE MM 91 P	PE-P	P	PE MM	1	5.7	7			0
461	PE MM 91 P	PE-P	P	PE MM	1	8.2	5			0
1211	PE MM 91 P	PE-P	P	PE MM	2	6.5	6.5			0
163	PE MM 91 P	PE-P	P	PE MM	1	4.9	4	26	16	1
393	PE MM 91 P	PE-P	P	PE MM	1	7.6	7	19.3548	7.62	1
1180	PE MM 91 P	PE-P	P	PE MM	2	6.3	6			0
1181	PE MM 91 P	PE-P	P	PE MM	2	6.3	7	18.2	13.6	1
1212	PE MM 91 P	PE-P	P	PE MM	2	6.5	5	17.4	6.7	1
1312	PE MM TS H	PE-H	H	PE MM	2	7.2	8			0
1313	PE MM2 100 P	PE-P	P	PE MM2	2	7.2	16			0
1346	PE MM2 100 P	PE-P	P	PE MM2	2	7.4	7			0
1124	PE MM2 100 P	PE-P	P	PE MM2	2	5.8	10	28.6	21	1
1135	PE MM2 100 P	PE-P	P	PE MM2	2	5.9	10	25.7	11.2	1
1314	PE MM2 100 P	PE-P	P	PE MM2	2	7.2	13	29.1	25.4	1
1607	PE MM2 102 P	PE-P	P	PE MM2	2	10.2	15.9	19.5	11.2	1
452	PE MM2 103 H	PE-H	H	PE MM2	1	8.1	10	12.1	8.3	1
1315	PE MM2 103 H	PE-H	H	PE MM2	2	7.2	9	21.8	9.5	1
245	PE MM2 103 H	PE-H	H	PE MM2	1	6.4	15.5	11.1	5.7	1
587	PE MM2 106 P	PE-P	P	PE MM2	1	11.8	9			0
357	PE MM2 106 P	PE-P	P	PE MM2	1	7.3	12	20.5	19.5	1
1486	PE MM2 106 P	PE-P	P	PE MM2	2	8.4	10	29.3	17.3	1
1619	PE MM2 106 P	PE-P	P	PE MM2	2	10.7	9	28.8	15	1
1192	PE MM2 109 H	PE-H	H	PE MM2	2	6.4	15.5	20.5	28	1
180	PE MM2 109 P	PE-P	P	PE MM2	1	5.4	9			0
1162	PE MM2 109 P	PE-P	P	PE MM2	2	6.2	6.5			0
1376	PE MM2 109 P	PE-P	P	PE MM2	2	7.6	12			0
1258	PE MM2 109 P	PE-P	P	PE MM2	2	6.8	9	18.6	15.1	1
1585	PE MM2 109 P	PE-P	P	PE MM2	2	9.9	16	35.2	21	1
1598	PE MM2 109 P	PE-P	P	PE MM2	2	10	13	37.5	34.1	1
532	PE MM2 121 H	PE-H	H	PE MM2	1	9.3	6			0
537	PE MM2 121 H	PE-H	H	PE MM2	1	9.4	7			0
584	PE MM2 121 H	PE-H	H	PE MM2	1	11.1	6			0
306	PE MM2 121 H	PE-H	H	PE MM2	1	6.8	12	22.7	11.4	1
1092	PE MM2 121 H	PE-H	H	PE MM2	2	5.4	10	28.8	29.9	1
1144	PE MM2 121 H	PE-H	H	PE MM2	2	6	9	29	10	1
1401	PE MM2 121 H	PE-H	H	PE MM2	2	7.7	7.5	25.6	10.2	1
1259	PE MM2 124 H	PE-H	H	PE MM2	2	6.8	11			0
1182	PE MM2 124 H	PE-H	H	PE MM2	2	6.3	11	13.7	13.2	1
1272	PE MM2 124 H	PE-H	H	PE MM2	2	6.9	16	26	13	1
1599	PE MM2 124 H	PE-H	H	PE MM2	2	10	10	24.4	10.2	1
413	PE MM2 124 H	PE-H	H	PE MM2	1	7.6	12			0
320	PE MM2 13 P	PE-P	P	PE MM2	1	6.9	10			0
1431	PE MM2 13 P	PE-P	P	PE MM2	2	7.9	13			0
1361	PE MM2 13 P	PE-P	P	PE MM2	2	7.5	5	9.6	4.6	1
1511	PE MM2 13 P	PE-P	P	PE MM2	2	8.7	12	27	16.1	1
1613	PE MM2 13 P	PE-P	P	PE MM2	2	10.4	4	36.6	15.2	1
219	PE MM2 13 P	PE-P	P	PE MM2	1	6.1	13			0
1586	PE MM2 130 H	PE-H	H	PE MM2	2	9.9	10			0
1060	PE MM2 130 P	PE-P	P	PE MM2	2	5	5			0
1072	PE MM2 130 P	PE-P	P	PE MM2	2	5.2	6	26.6	6.8	1
1476	PE MM2 130 P	PE-P	P	PE MM2	2	8.3	14	29.2	20.3	1
1329	PE MM2 16 P	PE-P	P	PE MM2	2	7.3	7			0
271	PE MM2 19 H	PE-H	H	PE MM2	1	6.6	8			0
268	PE MM2 19 H	PE-H	H	PE MM2	1	6.6	9	37.9	17.9	1
1051	PE MM2 19 H	PE-H	H	PE MM2	2	4.9	4			0
1611	PE MM2 19 P	PE-P	P	PE MM2	2	10.3	8	30.8	27.2	1
1347	PE MM2 22 H	PE-H	H	PE MM2	2	7.4	12			0
479	PE MM2 22 P	PE-P	P	PE MM2	1	8.4	6			0
508	PE MM2 22 P	PE-P	P	PE MM2	1	8.9	11			0
1039	PE MM2 22 P	PE-P	P	PE MM2	2	4.6	9			0
327	PE MM2 22 P	PE-P	P	PE MM2	1	7	5	18.9	13	1
173	PE MM2 24 H	PE-H	H	PE MM2	1	5.2	8			0
1145	PE MM2 24 H	PE-H	H	PE MM2	2	6	16	13.1	17	1
554	PE MM2 25 H	PE-H	H	PE MM2	1	9.9	8.5			0
1600	PE MM2 27 P	PE-P	P	PE MM2	2	10	11	29.7	12.8	1
498	PE MM2 28 h	PE-H	H	PE MM2	1	8.8	7	21.1	8.3	1
549	PE MM2 28 P	PE-P	P	PE MM2	1	9.6	9.5			0
281	PE MM2 28 P	PE-P	P	PE MM2	1	6.6	15			0
170	PE MM2 31 P	PE-P	P	PE MM2	1	5.2	8			0
299	PE MM2 31 P	PE-P	P	PE MM2	1	6.8	7			0
381	PE MM2 31 P	PE-P	P	PE MM2	1	7.5	7			0
402	PE MM2 31 P	PE-P	P	PE MM2	1	7.6	10			0
439	PE MM2 31 P	PE-H	H	PE MM2	1	7.8	7	12.8	7.8	1
186	PE MM2 34 P	PE-P	P	PE MM2	1	5.5	11			0
425	PE MM2 34 P	PE-P	P	PE MM2	1	7.7	9			0
225	PE MM2 34 P	PE-P	P	PE MM2	1	6.2	11.6	23.36	17	1
408	PE MM2 34 P	PE-P	P	PE MM2	1	7.6	10			0
590	PE MM2 34 P	PE-P	P	PE MM2	1	11.8	9			0
1442	PE MM2 37 H	PE-H	H	PE MM2	2	8	13			0
315	PE MM2 37 P	PE-P	P	PE MM2	1	6.9	10			0
397	PE MM2 37 P	PE-P	P	PE MM2	1	7.6	10			0
398	PE MM2 37 P	PE-P	P	PE MM2	1	7.6	7			0
572	PE MM2 37 P	PE-P	P	PE MM2	1	10	6			0
374	PE MM2 37 P	PE-P	P	PE MM2	1	7.4	12	37	22	1
1291	PE MM2 37 P	PE-P	P	PE MM2	2	7	11	29.3	11.2	1
496	PE MM2 37 P	PE-P	P	PE MM2	1	8.7	10	38.5	18	1
1570	PE MM2 37 P	PE-P	P	PE MM2	2	9.5	13	28.2	14	1
558	PE MM2 371P	PE-P	P	PE MM2	1	9.9	10			0
1316	PE MM2 40 H	PE-H	H	PE MM2	2	7.2	9	22	14.4	1
522	PE MM2 40 P	PE-P	P	PE MM2	1	9.2	4.5			0
1195	PE MM2 40 P	PE-P	P	PE MM2	2	6.4	9			0
555	PE MM2 43 P	PE-P	P	PE MM2	1	9.9	10.5			0
505	PE MM2 52 H	PE-H	H	PE MM2	1	8.9	10			0
1456	PE MM2 54 P	PE-P	P	PE MM2	2	8.1	9.5	21.1	11.4	1
313	PE MM2 61 H	PE-H	H	PE MM2	1	6.9	10			0
494	PE MM2 61 H	PE-H	H	PE MM2	1	8.7	10			0
1587	PE MM2 61 H	PE-H	H	PE MM2	2	9.9	11			0
342	PE MM2 61 H	PE-H	H	PE MM2	1	7.2	8	32.5	11.9	1
1616	PE MM2 61 H	PE-H	H	PE MM2	2	10.6	9	28.4	12.3	1
1638	PE MM2 61 H	PE-H	H	PE MM2	2	12.1	9	37.4	19.6	1
542	PE MM2 61 H	PE-H	H	PE MM2	1	9.4	15			0
365	PE MM2 76 P	PE-P	P	PE MM2	1	7.4	15			0
1579	PE MM2 76 P	PE-P	P	PE MM2	2	9.8	7	31.7	15.3	1
1648	PE MM2 76 P	PE-P	P	PE MM2	2	14.6	11	31.8	29.2	1
1920	PE MM2 76 P	PT-P	P	PE MM2	2	6.5	8			0
1467	PE MM2 76 P	PE-P	P	PE MM2	2	8.2	11	23.5	16	1
588	PE MM2 79 P	PE-P	P	PE MM2	1	11.8	9			0
1411	PE MM2 79 P	PE-P	P	PE MM2	2	7.8	9.5	19	14	1
236	PE MM2 82 P	PE-P	P	PE MM2	1	6.3	6			0
1052	PE MM2 82 P	PE-P	P	PE MM2	2	4.9	4			0
1163	PE MM2 82 P	PE-P	P	PE MM2	2	6.2	11			0
287	PE MM2 82 P	PE-P	P	PE MM2	1	6.7	10	16.6	11.2	1
1213	PE MM2 82 P	PE-P	P	PE MM2	2	6.5	13	20.6	15.6	1
1402	PE MM2 82 P	PE-P	P	PE MM2	2	7.7	11	24.5	15.2	1
1463	PE MM2 82 P	PE-P	P	PE MM2	2	8.2	11.4	22.7	18	1
1499	PE MM2 82 P	PE-P	P	PE MM2	2	8.6	12.5	18.2	14	1
1609	PE MM2 82 P	PE-P	P	PE MM2	2	10.3	9	32.2	16	1
1640	PE MM2 82 P	PE-P	P	PE MM2	2	12.4	9	35	11.2	1
1553	PE MM2 82 P	PE-P	P	PE MM2	2	9.3	12			0
507	PE MM2 88 H	PE-H	H	PE MM2	1	8.9	4			0
1487	PE MM2 88 H	PE-H	H	PE MM2	2	8.4	6			0
1183	PE MM2 88 H	PE-H	H	PE MM2	2	6.3	9	23.8	13.3	1
1061	PE MM2 9 P	PE-P	P	PE MM2	2	5	10	17.2	28	1
963	PE MM2 91 H	PE-H	H	PE MM2	2	5.8	10	10.2	9.8	1
255	PE MM2 91 H	PE-H	H	PE MM2	1	6.5	7			0
1617	PE MM2 91 H	PE-H	H	PE MM2	2	10.6	11.5			0
1330	PE MM2 91 H	PE-H	H	PE MM2	2	7.3	10	27.4	15.9	1
1432	PE MM2 91 H	PE-H	H	PE MM2	2	7.9	10	36	16	1
1488	PE MM2 91 H	PE-H	H	PE MM2	2	8.4	12	32.4	18.6	1
1500	PE MM2 91 H	PE-H	H	PE MM2	2	8.6	13	34.5	23.2	1
260	PE MM2 91 H	PE-H	H	PE MM2	1	6.5	13			0
202	PE MM2 91 P	PE-P	P	PE MM2	1	5.7	8			0
418	PE MM2 97 H	PE-H	H	PE MM2	1	7.7	14			0
448	PE MM2 97 H	PE-H	H	PE MM2	1	8	13			0
1377	PE MM2 97 H	PE-H	H	PE MM2	2	7.6	8			0
176	PE MM2 97 H	PE-H	H	PE MM2	1	5.3	5	30.9	14.6	1
1114	PE MM2 97 H	PE-H	H	PE MM2	2	5.7	7	35.3	18.6	1
1273	PE MM2 97 H	PE-H	H	PE MM2	2	6.9	11	16	14.6	1
308	PE MM2 97 H	PE-H	H	PE MM2	1	6.8	11			0
1973	PE MM2 97 H	PT-H	H	PE MM2	2	7.6	7			0
1614	PE MM2 98 H	PE-H	H	PE MM2	2	10.4	13	38.5	35.1	1
1675	PE MM2 P	PE-P	P	PE MM2	2	5.6	22			0
1087	PE MP H	PE-H	H	PE MP	2	5.4	10			0
340	PE MP 1 P	PE-P	P	PE MP	1	7.2	7			0
438	PE MP 10 P	PE-P	P	PE MP	1	7.8	7			0
531	PE MP 10 P	PE-P	P	PE MP	1	9.3	8			0
349	PE MP 10 P	PE-P	P	PE MP	1	7.2	14	28.7	17	1
1576	PE MP 10 P	PE-P	P	PE MP	2	9.7	12	17.4	14.1	1
140	PE MP 10 P	PE-P	P	PE MP	1	2.3	11			0
323	PE MP 10 P	PE-P	P	PE MP	1	6.9	10			0
1292	PE MP 10 P	PE-P	P	PE MP	2	7	10	26.1	15.4	1
311	PE MP 103 P	PE-P	P	PE MP	1	6.9	15			0
530	PE MP 103 P	PE-P	P	PE MP	1	9.3	6			0
1275	PE MP 103 P	PE-P	P	PE MP	2	6.9	16			0
213	PE MP 103 P	PE-P	P	PE MP	1	6	16	26.6	29.2	1
399	PE MP 103 P	PE-P	P	PE MP	1	7.6	6	35.5	29	1
1303	PE MP 103 P	PE-P	P	PE MP	2	7.1	4	15.3	11	1
1563	PE MP 103 P	PE-P	P	PE MP	2	9.4	15	14.2	33.3	1
1196	PE MP 103 P	PE-P	P	PE MP	2	6.4	8			0
1393	PE MP 106 H	PE-H	H	PE MP	2	7.7	10.2			0
261	PE MP 106 H	PE-H	H	PE MP	1	6.5	11			0
257	PE MP 106 H	PE-H	H	PE MP	1	6.5	5	18.4	7	1
1348	PE MP 106 H	PE-H	H	PE MP	2	7.4	12	21.8	16.1	1
1356	PE MP 106 H	PE-H	H	PE MP	2	7.4	12	24.5	12.8	1
1691	PE MP 106 H	PE-H	H	PE MP	2	7.3	12			0
206	PE MP 106 P	PE-P	P	PE MP	1	5.8	10			0
1261	PE MP 106 P	PE-P	P	PE MP	2	6.8	6			0
1304	PE MP 106 P	PE-P	P	PE MP	2	7.1	9			0
1443	PE MP 106 P	PE-P	P	PE MP	2	8	10			0
960	PE MP 112 H	PE-H	H	PE MP	2	5.7	17	14.9	14.3	1
440	PE MP 118 H	PE-H	H	PE MP	1	7.9	11	23.622	22.1	1
1197	PE MP 121 H	PE-H	H	PE MP	2	6.4	10	20.3	19	1
1293	PE MP 124 P	PE-P	P	PE MP	2	7	5			0
396	PE MP 13 H	PE-H	H	PE MP	1	7.6	12			0
1229	PE MP 13 H	PE-H	H	PE MP	2	6.6	11.5			0
217	PE MP 13 P	PE-P	P	PE MP	1	6.1	4.5			0
1512	PE MP 13 P	PE-P	P	PE MP	2	8.7	11			0
150	PE MP 13 P	PE-P	P	PE MP	1	3.9	8	11.7	22	1
580	PE MP 13 P	PE-P	P	PE MP	1	10.6	9			0
528	PE MP 13 P	PE-P	P	PE MP	1	9.2	4	19.7	15.4	1
544	PE MP 130 H	PE-P	P	PE MP	1	9.5	8	11.938	8	1
1244	PE MP 143 H	PE-H	H	PE MP	2	6.7	7	20.2	14.3	1
1468	PE MP 19 H	PE-H	H	PE MP	2	8.2	6	38	18	1
1184	PE MP 21 P	PE-P	P	PE MP	2	6.3	8			0
1561	PE MP 22 P	PE-P	P	PE MP	2	9.4	7	18	16.8	1
149	PE MP 22 P	PE-P	P	PE MP	1	3.9	8			0
259	PE MP 22 P	PE-P	P	PE MP	1	6.5	5			0
286	PE MP 22 P	PE-P	P	PE MP	1	6.7	12			0
339	PE MP 22 P	PE-P	P	PE MP	1	7.2	14			0
451	PE MP 22 P	PE-P	P	PE MP	1	8.1	8.5			0
538	PE MP 22 P	PE-P	P	PE MP	1	9.4	15			0
1032	PE MP 22 P	PE-P	P	PE MP	2	4.1	5.5			0
1053	PE MP 22 P	PE-P	P	PE MP	2	4.9	6	27	17.6	1
1245	PE MP 22 P	PE-P	P	PE MP	2	6.7	6	26	19	1
1286	PE MP 22 P	PE-P	P	PE MP	2	7	9	19.2	8	1
1317	PE MP 22 P	PE-P	P	PE MP	2	7.2	9	35.5	20.3	1
1318	PE MP 22 P	PE-P	P	PE MP	2	7.2	14	22.5	4.3	1
1332	PE MP 22 P	PE-P	P	PE MP	2	7.3	8	29.4	14	1
1457	PE MP 22 P	PE-P	P	PE MP	2	8.1	7	16.9	17.2	1
1067	PE MP 22 P	PE-P	P	PE MP	2	5.1	6	18.5	10	1
1635	PE MP 22 P	PE-P	P	PE MP	2	12	7			0
1362	PE MP 22 P	PE-P	P	PE MP	2	7.5	10	19	17.2	1
1951	PE MP 22 P	PT-P	P	PE MP	2	7	7	12.2	8	1
1403	PE MP 22P	PE-P	P	PE MP	2	7.7	6	20.9	15.2	1
1115	PE MP 23 P	PE-P	P	PE MP	2	5.7	4	30.9	20	1
240	PE MP 24 H	PE-H	H	PE MP	1	6.4	10			0
1319	PE MP 27 H	PE-H	H	PE MP	2	7.2	10	30.5	28.4	1
376	PE MP 28 H	PE-H	H	PE MP	1	7.4	10			0
495	PE MP 28 H	PE-H	H	PE MP	1	8.7	10			0
283	PE MP 28 H	PE-H	H	PE MP	1	6.7	7	16.4	26.4	1
1146	PE MP 28 H	PE-H	H	PE MP	2	6	10	24.5	15	1
1262	PE MP 28 H	PE-H	H	PE MP	2	6.8	6	29.4	24.5	1
1276	PE MP 28 H	PE-H	H	PE MP	2	6.9	10	19.3	18.3	1
1320	PE MP 28 H	PE-H	H	PE MP	2	7.2	7	27.4	12.1	1
392	PE MP 28 H	PE-H	H	PE MP	1	7.6	6	23.9	7.9	1
1084	PE MP 28 H	PE-H	H	PE MP	2	5.3	5	23.9	12	1
1554	PE MP 28 H	PE-H	H	PE MP	2	9.3	8	23.9		1
430	PE MP 31 H	PE-H	H	PE MP	1	7.7	15			0
218	PE MP 34 H	PE-H	H	PE MP	1	6.1	13			0
1564	PE MP 34 H	PE-H	H	PE MP	2	9.4	15			0
1444	PE MP 37 H	PE-H	H	PE MP	2	8	8			0
1550	PE MP 37 P	PE-P	P	PE MP	2	9.3	12			0
346	PE MP 37 P	PE-P	P	PE MP	1	7.2	7			0
844	PE MP 4 H	PE-H	H	PE MP	1	6.9	10			0
1126	PE MP 4 P	PE-P	P	PE MP	2	5.8	5			0
1501	PE MP 4 P	PE-P	P	PE MP	2	8.6	13			0
1230	PE MP 4 P	PE-P	P	PE MP	2	6.6	6	21.4	12.6	1
1263	PE MP 4 P	PE-P	P	PE MP	2	6.8	10	15.6	12	1
1136	PE MP 4 P	PE-P	P	PE MP	2	5.9	5	20.6	11.2	1
148	PE MP 40 P	PE-P	P	PE MP	1	3.9	8			0
567	PE MP 40 P	PE-P	P	PE MP	1	9.9	12	12	28	1
1073	PE MP 40 P	PE-P	P	PE MP	2	5.2	5	16.1	15.3	1
1077	PE MP 40 P	PE-P	P	PE MP	2	5.2	5	17.8	10.3	1
883	PE MP 43 H	PE-H	H	PE MP	2	4.3	17			0
319	PE MP 43 H	PE-H	H	PE MP	1	6.9	10			0
345	PE MP 43 H	PE-H	H	PE MP	1	7.2	10			0
383	PE MP 43 H	PE-H	H	PE MP	1	7.5	11			0
395	PE MP 43 H	PE-H	H	PE MP	1	7.6	7			0
1185	PE MP 43 H	PE-H	H	PE MP	2	6.3	6			0
441	PE MP 43 H	PE-H	H	PE MP	1	7.9	11.5	10.8	29	1
389	PE MP 43 H	PE-H	H	PE MP	1	7.5	8	17.7	11.2	1
1412	PE MP 46 P	PE-P	P	PE MP	2	7.8	12			0
1205	PE MP 46 P	PE-P	P	PE MP	2	6.4	15.5			0
525	PE MP 46 P	PE-P	P	PE MP	1	9.2	7			0
586	PE MP 48 P	PE-P	P	PE MP	1	11.1	6	20.6	12.6	1
1159	PE MP 49 P	PE-P	P	PE MP	2	6.1	12	19.3	13.3	1
1622	PE MP 52 H	PE-H	H	PE MP	2	10.9	9			0
385	PE MP 52 P	PE-P	P	PE MP	1	7.5	7			0
419	PE MP 52 P	PE-P	P	PE MP	1	7.7	11.5			0
475	PE MP 52 P	PE-P	P	PE MP	1	8.4	6			0
1214	PE MP 52 P	PE-P	P	PE MP	2	6.5	9			0
1127	PE MP 52 P	PE-P	P	PE MP	2	5.8	8	22.5	12.9	1
1198	PE MP 52 P	PE-P	P	PE MP	2	6.4	8	17.5	8.2	1
1165	PE MP 52 P	PE-P	P	PE MP	2	6.2	10			0
533	PE MP 55 H	PE-H	H	PE MP	1	9.3	11			0
1698	PE MP 63 H	PE-H	H	PE MP	2	7.8	10	20.8	21.4	1
1528	PE MP 64 H	PE-H	H	PE MP	2	8.9	13.4			0
1489	PE MP 67 P	PE-P	P	PE MP	2	8.4	12	19	19.2	1
199	PE MP 7 H	PE-H	H	PE MP	1	5.7	12			0
1363	PE MP 7 H	PE-H	H	PE MP	2	7.5	7	9.6	10	1
216	PE MP 7 H	PE-H	H	PE MP	1	6	16			0
1274	PE MP 7 P	PE-P	P	PE MP	2	6.9	15			0
1246	PE MP 7 P	PE-P	P	PE MP	2	6.7	6			0
1327	PE MP 7 P	PE-P	P	PE MP	2	7.3	7.5	13.3	14	1
1333	PE MP 7 P	PE-P	P	PE MP	2	7.3	9	10.4	10.4	1
1477	PE MP 7 P	PE-P	P	PE MP	2	8.3	7	30.1	12	1
559	PE MP 73 P	PE-P	P	PE MP	1	9.9	8.5			0
499	PE MP 74 P	PE-P	P	PE MP	1	8.8	7			0
253	PE MP 79 P	PE-P	P	PE MP	1	6.5	5			0
338	PE MP 79 P	PE-P	P	PE MP	1	7.2	14	7.5	4.5	1
1025	PE MP 79 P	PE-P	P	PE MP	2	3.1	8	37.2	34	1
1689	PE MP 79 P	PE-P	P	PE MP	2	7.2	9			0
307	PE MP 79 P	PE-P	P	PE MP	1	6.8	6.5			0
233	PE MP 79 P	PE-P	P	PE MP	1	6.3	11	19	18.1	1
1215	PE MP 90 P	PE-P	P	PE MP	2	6.5	8	23.5	13.9	1
1458	PE MP 91 P	PE-P	P	PE MP	2	8.1	12	21.9	15.6	1
364	PE MP 94 H	PE-H	H	PE MP	1	7.4	10			0
512	PE MP 94 H	PE-H	H	PE MP	1	8.9	11			0
295	PE MP 94 H	PE-H	H	PE MP	1	6.8	12	47.4	48.2	1
361	PE MP 94 H	PE-H	H	PE MP	1	7.3	12	20.2	4.4	1
450	PE MP 94 H	PE-H	H	PE MP	1	8.1	10	22.7	13.1	1
1199	PE MP 94 H	PE-H	H	PE MP	2	6.4	10	30.4	16.2	1
1231	PE MP 94 H	PE-H	H	PE MP	2	6.6	6	32.6	19.8	1
1277	PE MP 94 H	PE-H	H	PE MP	2	6.9	10	18.1	15	1
1379	PE MP 94 H	PE-H	H	PE MP	2	7.6	6	22	10	1
1413	PE MP 94 H	PE-H	H	PE MP	2	7.8	10.5	24	16.5	1
1389	PE MP 94 H	PE-H	H	PE MP	2	7.6	6	32.5	36.1	1
234	PE MP 97 P	PE-P	P	PE MP	1	6.3	12			0
1414	PE MP2 73 H	PE-H	H	PE MP2	2	7.8	14	25.2	18	1
1022	PE MP2 1 H	PE-H	H	PE MP2	2	2.3	11	35.5	20.6	1
167	PE MP2 1 P	PE-P	P	PE MP2	1	5.1	10			0
284	PE MP2 1 P	PE-P	P	PE MP2	1	6.7	10			0
526	PE MP2 1 P	PE-P	P	PE MP2	1	9.2	4.5			0
1147	PE MP2 1 P	PE-P	P	PE MP2	2	6	7			0
1232	PE MP2 1 P	PE-P	P	PE MP2	2	6.6	6			0
1577	PE MP2 1 P	PE-P	P	PE MP2	2	9.7	9			0
504	PE MP2 1 P	PE-P	P	PE MP2	1	8.9	10	21.4	10.5	1
1054	PE MP2 1 P	PE-P	P	PE MP2	2	4.9	10	10.6	12	1
1216	PE MP2 1 P	PE-P	P	PE MP2	2	6.5	7	15.8	10.3	1
1519	PE MP2 1 P	PE-P	P	PE MP2	2	8.8	7	34.9	27.6	1
1629	PE MP2 1 P	PE-P	P	PE MP2	2	11.3	21	16.8	12	1
378	PE MP2 10 H	PE-H	H	PE MP2	1	7.4	12	15.1	14.2	1
1206	PE MP2 10 H	PE-H	H	PE MP2	2	6.5	5	20.8	22	1
288	PE MP2 10 P	PE-P	P	PE MP2	1	6.7	7			0
1055	PE MP2 10 P	PE-P	P	PE MP2	2	4.9	10			0
1433	PE MP2 10 P	PE-P	P	PE MP2	2	7.9	11.5			0
1529	PE MP2 10 P	PE-P	P	PE MP2	2	8.9	5			0
182	PE MP2 10 P	PE-P	P	PE MP2	1	5.4	14	25.8	12.4	1
330	PE MP2 10 P	PE-P	P	PE MP2	1	7	11	27.3	11.9	1
1530	PE MP2 10 P	PE-P	P	PE MP2	2	8.9	11	24.4	20	1
401	PE MP2 100 P	PE-P	P	PE MP2	1	7.6	7			0
1200	PE MP2 100 P	PE-P	P	PE MP2	2	6.4	16			0
443	PE MP2 100 P	PE-P	P	PE MP2	1	7.9	6	31.5	11.7	1
1380	PE MP2 100 P	PE-P	P	PE MP2	2	7.6	4	30.1	17	1
1294	PE MP2 103 H	PE-H	H	PE MP2	2	7	10	10.7	9.4	1
228	PE MP2 106 P	PE-P	P	PE MP2	1	6.3	12	19.812	18.1	1
189	PE MP2 121 H	PE-H	H	PE MP2	1	5.5	11			0
1056	PE MP2 121 H	PE-H	H	PE MP2	2	4.9	6	18.3	9.6	1
1321	PE MP2 121 H	PE-H	H	PE MP2	2	7.2	7	31.6	16.5	1
492	PE MP2 124 P	PE-P	P	PE MP2	1	8.7	10			0
536	PE MP2 124 P	PE-P	P	PE MP2	1	9.4	15			0
151	PE MP2 124 P	PE-P	P	PE MP2	1	4.3	6	14.732	14.2	1
468	PE MP2 124 P	PE-P	P	PE MP2	1	8.3	11	32.258	7.62	1
1062	PE MP2 124 P	PE-P	P	PE MP2	2	5	7.2	19.1	12.3	1
1105	PE MP2 124 P	PE-P	P	PE MP2	2	5.6	16	22	15.7	1
1217	PE MP2 124 P	PE-P	P	PE MP2	2	6.5	8	19.2	27	1
1404	PE MP2 124 P	PE-P	P	PE MP2	2	7.7	16	17.5	26.6	1
1415	PE MP2 124 P	PE-P	P	PE MP2	2	7.8	8.5	46.5	13.6	1
1029	PE MP2 124 P	PE-P	P	PE MP2	2	3.9	7	15.3	7.2	1
1502	PE MP2 124 P	PE-P	P	PE MP2	2	8.6	18			0
1247	PE MP2 124 P	PE-P	P	PE MP2	2	6.7	14.5	10.9	17.2	1
1849	PE MP2 124 P	PT-P	P	PE MP2	2	5.4	8	14	10	1
192	PE MP2 13 H	PE-H	H	PE MP2	1	5.6	7			0
229	PE MP2 13 H	PE-H	H	PE MP2	1	6.3	7			0
1434	PE MP2 13 H	PE-H	H	PE MP2	2	7.9	11			0
191	PE MP2 13 H	PE-H	H	PE MP2	1	5.5	8			0
294	PE MP2 13 H	PE-H	H	PE MP2	1	6.7	7			0
1478	PE MP2 130 H	PE-H	H	PE MP2	2	8.3	16	24.1	19.2	1
211	PE MP2 130 P	PE-P	P	PE MP2	1	6	10			0
551	PE MP2 130 P	PE-P	P	PE MP2	1	9.8	14			0
158	PE MP2 130 P	PE-P	P	PE MP2	1	4.9	6	19.7	16.7	1
1106	PE MP2 130 P	PE-P	P	PE MP2	2	5.6	11	26.8	29.4	1
1531	PE MP2 130 P	PE-P	P	PE MP2	2	8.9	17	34.4	57.7	1
562	PE MP2 130 P	PE-P	P	PE MP2	1	9.9	12			0
404	PE MP2 130 P	PE-P	P	PE MP2	1	7.6	6	22.6	16.3	1
535	PE MP2 130 P	PE-P	P	PE MP2	1	9.3	8	14.3	13.9	1
1264	PE MP2 130 P	PE-P	P	PE MP2	2	6.8	9	23.9	14.7	1
1879	PE MP2 130 P	PT-P	P	PE MP2	2	5.8	8	21.5	23.2	1
1643	PE MP2 15 H	PE-H	H	PE MP2	2	12.6	9	17.2	22.6	1
152	PE MP2 16 P	PE-P	P	PE MP2	1	4.3	6			0
459	PE MP2 16 P	PE-P	P	PE MP2	1	8.1	10			0
153	PE MP2 19 H	PE-H	H	PE MP2	1	4.3	6			0
520	PE MP2 19 H	PE-H	H	PE MP2	1	9.2	7			0
1248	PE MP2 19 H	PE-H	H	PE MP2	2	6.7	7			0
465	PE MP2 19 H	PE-H	H	PE MP2	1	8.2	6	13.3	19.9	1
1093	PE MP2 19 H	PE-H	H	PE MP2	2	5.4	12	18	14.3	1
1278	PE MP2 19 H	PE-H	H	PE MP2	2	6.9	10	25.8	19.9	1
1469	PE MP2 19 H	PE-H	H	PE MP2	2	8.2	14	32.4	23.9	1
1450	PE MP2 22 P	PE-P	P	PE MP2	2	8.1	9	21.6	14.8	1
157	PE MP2 22 P	PE-P	P	PE MP2	1	4.8	8			0
400	PE MP2 22 P	PE-P	P	PE MP2	1	7.6	9.9			0
1166	PE MP2 22 P	PE-P	P	PE MP2	2	6.2	5.5	27.1	20.2	1
1334	PE MP2 22 P	PE-P	P	PE MP2	2	7.3	11	25.9	18	1
576	PE MP2 27 H	PE-H	H	PE MP2	1	10.4	6			0
1479	PE MP2 27 H	PE-H	H	PE MP2	2	8.3	11			0
384	PE MP2 31 H	PE-H	H	PE MP2	1	7.5	11			0
1636	PE MP2 31 H	PE-H	H	PE MP2	2	12	8			0
194	PE MP2 31 H	PE-H	H	PE MP2	1	5.6	7	19.6	17.2	1
1295	PE MP2 31 H	PE-H	H	PE MP2	2	7	11	21.7	22.1	1
1571	PE MP2 31 H	PE-H	H	PE MP2	2	9.5	8	17.3	12.7	1
1033	PE MP2 31 H	PE-H	H	PE MP2	2	4.1	5.5			0
574	PE MP2 31 H	PE-H	H	PE MP2	1	10	8	26.5	29.5	1
518	PE MP2 34 H	PE-H	H	PE MP2	1	9.1	14			0
1364	PE MP2 34 H	PE-H	H	PE MP2	2	7.5	8			0
181	PE MP2 34 H	PE-H	H	PE MP2	1	5.4	14	26.4	16.4	1
1480	PE MP2 34 H	PE-H	H	PE MP2	2	8.3	16	12.6	21	1
1349	PE MP2 34 H	PE-H	H	PE MP2	2	7.4	15			0
1372	PE MP2 37 H	PE-H	H	PE MP2	2	7.6	12	24.4	16.2	1
1227	PE MP2 37 H	PE-H	H	PE MP2	2	6.6	9	25.2	17.8	1
348	PE MP2 37 H	PE-H	H	PE MP2	1	7.2	9			0
550	PE MP2 37 H	PE-H	H	PE MP2	1	9.8	14			0
1589	PE MP2 37 H	PE-H	H	PE MP2	2	9.9	6			0
1128	PE MP2 37 H	PE-H	H	PE MP2	2	5.8	10	27	11.2	1
1391	PE MP2 37 H	PE-H	H	PE MP2	2	7.7	9	20.09	16	1
1435	PE MP2 37 H	PE-H	H	PE MP2	2	7.9	12	20	16.2	1
1588	PE MP2 37 H	PE-H	H	PE MP2	2	9.9	11	26.6	16.2	1
1603	PE MP2 37 H	PE-H	H	PE MP2	2	10.1	15	33.1	30.2	1
1633	PE MP2 37 H	PE-H	H	PE MP2	2	11.8	9	21	15	1
1532	PE MP2 37 P	PE-P	P	PE MP2	2	8.9	7	14.4	7.3	1
379	PE MP2 38 P	PE-P	P	PE MP2	1	7.4	12			0
463	PE MP2 38 P	PE-P	P	PE MP2	1	8.2	6			0
371	PE MP2 4 H	PE-H	H	PE MP2	1	7.4	9			0
1322	PE MP2 4 H	PE-H	H	PE MP2	2	7.2	8	18.6	11.2	1
1580	PE MP2 4 H	PE-H	H	PE MP2	2	9.8	14	33.7	23.8	1
565	PE MP2 40 H	PE-H	H	PE MP2	1	9.9	10.5	20.4	14.4	1
1416	PE MP2 40 H	PE-H	H	PE MP2	2	7.8	13	14	9.2	1
1533	PE MP2 40 H	PE-H	H	PE MP2	2	8.9	10	29	17.2	1
1425	PE MP2 41 H	PE-H	H	PE MP2	2	7.9	11.5	18	14	1
1357	PE MP2 43 P	PE-P	P	PE MP2	2	7.5	11	22.4	20.7	1
1644	PE MP2 46 H	PE-H	H	PE MP2	2	12.6	9	36.2	25.3	1
91	PE MP2 49 P	PE-P	P	PE MP2	1	7.8	7	16.51	7.6	1
232	PE MP2 49 P	PE-P	P	PE MP2	1	6.3	6			0
1495	PE MP2 49 P	PE-P	P	PE MP2	2	8.5	8			0
1191	PE MP2 49 P	PE-P	P	PE MP2	2	6.4	13	16.2	18	1
1618	PE MP2 49 P	PE-P	P	PE MP2	2	10.6	18	29	26.8	1
336	PE MP2 49 P	PE-P	P	PE MP2	1	7	5			0
1470	PE MP2 49 P	PE-P	P	PE MP2	2	8.2	14			0
276	PE MP2 52 P	PE-P	P	PE MP2	1	6.6	7			0
1233	PE MP2 52 P	PE-P	P	PE MP2	2	6.6	7	19	14	1
1706	PE MP2 52 P	PE-P	P	PE MP2	2	9.2	17			0
1604	PE MP2 52 P	PE-P	P	PE MP2	2	10.1	10.5	15.4	9.8	1
209	PE MP2 55 P	PE-P	P	PE MP2	1	6	7.5			0
304	PE MP2 55 P	PE-P	P	PE MP2	1	6.8	11			0
1037	PE MP2 55 P	PE-P	P	PE MP2	2	4.5	5			0
1040	PE MP2 55 P	PE-P	P	PE MP2	2	4.6	8			0
1107	PE MP2 55 P	PE-P	P	PE MP2	2	5.6	7			0
1129	PE MP2 55 P	PE-P	P	PE MP2	2	5.8	6			0
1218	PE MP2 55 P	PE-P	P	PE MP2	2	6.5	9	26	21.6	1
1459	PE MP2 55 P	PE-P	P	PE MP2	2	8.1	13	22	17.7	1
1436	PE MP2 55 P	PE-P	P	PE MP2	2	7.9	7	21.3	9.2	1
1116	PE MP2 61 H	PE-H	H	PE MP2	2	5.7	14	19	10.4	1
258	PE MP2 61 P	PE-P	P	PE MP2	1	6.5	5			0
1296	PE MP2 61 P	PE-P	P	PE MP2	2	7	8	28.1	14.6	1
1565	PE MP2 61 P	PE-P	P	PE MP2	2	9.4	10	19.2	17.3	1
1130	PE MP2 61 P	PE-P	P	PE MP2	2	5.8	4			0
1417	PE MP2 61 P	PE-P	P	PE MP2	2	7.8	13			0
1323	PE MP2 61 P	PE-P	P	PE MP2	2	7.2	9	21	15.8	1
1520	PE MP2 62 P	PE-P	P	PE MP2	2	8.8	10	15.3	10.2	1
248	PE MP2 64 P	PE-P	P	PE MP2	1	6.5	13			0
409	PE MP2 64 P	PE-P	P	PE MP2	1	7.6	6			0
469	PE MP2 64 P	PE-P	P	PE MP2	1	8.3	16			0
474	PE MP2 64 P	PE-P	P	PE MP2	1	8.3	16			0
560	PE MP2 64 P	PE-P	P	PE MP2	1	9.9	10.5			0
1350	PE MP2 64 P	PE-P	P	PE MP2	2	7.4	9	37.3	22.3	1
1044	PE MP2 64 P	PE-P	P	PE MP2	2	4.7	5	26.3	19.6	1
1186	PE MP2 64 P	PE-P	P	PE MP2	2	6.3	12	19.1	9.8	1
516	PE MP2 7 H	PE-H	H	PE MP2	1	9.1	11			0
1234	PE MP2 7 H	PE-H	H	PE MP2	2	6.6	6			0
1365	PE MP2 7 H	PE-H	H	PE MP2	2	7.5	11	20	17	1
273	PE MP2 7 P	PE-P	P	PE MP2	1	6.6	11.5			0
1381	PE MP2 7 P	PE-P	P	PE MP2	2	7.6	7			0
368	PE MP2 70 P	PE-P	P	PE MP2	1	7.4	12			0
417	PE MP2 70 P	PE-P	P	PE MP2	1	7.7	9			0
1066	PE MP2 70 P	PE-P	P	PE MP2	2	5.1	7			0
1445	PE MP2 70 P	PE-P	P	PE MP2	2	8	10			0
335	PE MP2 70 P	PE-P	P	PE MP2	1	7	9	26.7	11.1	1
557	PE MP2 70 P	PE-P	P	PE MP2	1	9.9	11	29	15	1
1305	PE MP2 70 P	PE-P	P	PE MP2	2	7.1	10	11.4	13.3	1
1270	PE MP2 72 P	PE-P	P	PE MP2	2	6.9	5			0
143	PE MP2 73 P	PE-P	P	PE MP2	1	2.7	3			0
485	PE MP2 73 P	PE-P	P	PE MP2	1	8.6	13			0
347	PE MP2 73 P	PE-P	P	PE MP2	1	7.2	9	24.4	22.6	1
1137	PE MP2 73 P	PE-P	P	PE MP2	2	5.9	7	34	26	1
1534	PE MP2 73 P	PE-P	P	PE MP2	2	8.9	6	38.6	26.8	1
1324	PE MP2 73 P	PE-P	P	PE MP2	2	7.2	10			0
215	PE MP2 79 P	PE-P	P	PE MP2	1	6	10			0
510	PE MP2 79 P	PE-P	P	PE MP2	1	8.9	4			0
561	PE MP2 79 P	PE-P	P	PE MP2	1	9.9	14			0
595	PE MP2 79 P	PE-P	P	PE MP2	1	12.6	9			0
1590	PE MP2 79 P	PE-P	P	PE MP2	2	9.9	10			0
1117	PE MP2 79 P	PE-P	P	PE MP2	2	5.7	12	30.7	23	1
251	PE MP2 79 P	PE-P	P	PE MP2	1	6.5	7			0
203	PE MP2 79 P	PE-P	P	PE MP2	1	5.7	14			0
1995	PE MP2 79 P	PT-P	P	PE MP2	2	8.5	5.5			0
1382	PE MP2 82 P	PE-P	P	PE MP2	2	7.6	9			0
1446	PE MP2 82 P	PE-P	P	PE MP2	2	8	9			0
1167	PE MP2 82 P	PE-P	P	PE MP2	2	6.2	6	26.5	20	1
1279	PE MP2 82 P	PE-P	P	PE MP2	2	6.9	11			0
1351	PE MP2 82 P	PE-P	P	PE MP2	2	7.4	4			0
254	PE MP2 85 P	PE-P	P	PE MP2	1	6.5	5			0
350	PE MP2 85 P	PE-P	P	PE MP2	1	7.2	8			0
579	PE MP2 85 P	PE-P	P	PE MP2	1	10.6	9	13.4	13.9	1
1063	PE MP2 85 P	PE-P	P	PE MP2	2	5	20	25.5	10	1
1383	PE MP2 85 P	PE-P	P	PE MP2	2	7.6	7			0
458	PE MP2 88 H	PE-H	H	PE MP2	1	8.1	10			0
220	PE MP2 88 P	PE-P	P	PE MP2	1	6.1	13			0
467	PE MP2 88 P	PE-P	P	PE MP2	1	8.2	6			0
578	PE MP2 88 P	PE-P	P	PE MP2	1	10.4	6			0
154	PE MP2 88 P	PE-P	P	PE MP2	1	4.6	4	14.7	7.1	1
227	PE MP2 88 P	PE-P	P	PE MP2	1	6.3	12	8.48	17	1
1043	PE MP2 88 P	PE-P	P	PE MP2	2	4.7	30	22.9	5.8	1
1555	PE MP2 88 P	PE-P	P	PE MP2	2	9.3	11	34.2	25.6	1
177	PE MP2 88 P	PE-P	P	PE MP2	1	5.3	5	16.6	9.5	1
196	PE MP2 91 P	PE-P	P	PE MP2	1	5.7	5			0
497	PE MP2 91 P	PE-P	P	PE MP2	1	8.8	9.2	13	10.5	1
1168	PE MP2 91 P	PE-P	P	PE MP2	2	6.2	10	24.9	23	1
1503	PE MP2 91 P	PE-P	P	PE MP2	2	8.6	11	26.4	38.8	1
1578	PE MP2 91 P	PE-P	P	PE MP2	2	9.7	9.5	40.8	23	1
1608	PE MP2 91 P	PE-P	P	PE MP2	2	10.2	9	27.5	21.2	1
412	PE MP2 91 P	PE-P	P	PE MP2	1	7.6	7	12.9	4.8	1
305	PE MP2 94 P	PE-P	P	PE MP2	1	6.8	12			0
1566	PE MP2 97 P	PE-P	P	PE MP2	2	9.4	10	42.2	26.2	1
1169	PE MP2 P	PE-P	P	PE MP2	2	6.2	6	18.7	21.2	1
1059	PE MP3 28 H	PE-H	H	PE MP3	2	5	5	15.7	9	1
1542	PE MP3 1 H	PE-H	H	PE MP3	2	9.1	14	25.6	18.4	1
321	PE MP3 1 H	PE-H	H	PE MP3	1	6.9	10			0
1556	PE MP3 1 H	PE-H	H	PE MP3	2	9.3	8			0
394	PE MP3 1 P	PE-P	P	PE MP3	1	7.6	12			0
488	PE MP3 1 P	PE-P	P	PE MP3	1	8.6	8			0
328	PE MP3 1 P	PE-P	P	PE MP3	1	7	11	24.8	14.4	1
1352	PE MP3 1 P	PE-P	P	PE MP3	2	7.4	11	31.9	24.2	1
1521	PE MP3 1 P	PE-P	P	PE MP3	2	8.8	7	22.7	16.6	1
325	PE MP3 100 P	PE-P	P	PE MP3	1	7	6			0
208	PE MP3 100 P	PE-P	P	PE MP3	1	6	16	12.9032	9.144	1
1353	PE MP3 100 P	PE-P	P	PE MP3	2	7.4	8	25.5	13	1
570	PE MP3 100 P	PE-P	P	PE MP3	1	10	8			0
1483	PE MP3 100 P	PE-P	P	PE MP3	2	8.4	12			0
585	PE MP3 100 P	PE-P	P	PE MP3	1	11.1	6			0
1335	PE MP3 103 H	PE-H	H	PE MP3	2	7.3	7	20	13	1
999	PE MP3 103 P	PE-P	P	PE MP3	2	7.5	8	20.5	11.2	1
231	PE MP3 103 P	PE-P	P	PE MP3	1	6.3	12			0
454	PE MP3 103 P	PE-P	P	PE MP3	1	8.1	10			0
487	PE MP3 103 P	PE-P	P	PE MP3	1	8.6	13			0
582	PE MP3 103 P	PE-P	P	PE MP3	1	10.9	9			0
1235	PE MP3 103 P	PE-P	P	PE MP3	2	6.6	7			0
1418	PE MP3 103 P	PE-P	P	PE MP3	2	7.8	19			0
1297	PE MP3 103 P	PE-P	P	PE MP3	2	7	10	23.2	15.8	1
1507	PE MP3 103 P	PE-P	P	PE MP3	2	8.7	5	13.4	6	1
1647	PE MP3 103 P	PE-P	P	PE MP3	2	14.1	6	27.7	22	1
147	PE MP3 103 P	PE-P	P	PE MP3	1	3.8	15			0
1634	PE MP3 103 P	PE-P	P	PE MP3	2	11.8	14	27	20.4	1
390	PE MP3 106 P	PE-P	P	PE MP3	1	7.5	7			0
473	PE MP3 106 P	PE-P	P	PE MP3	1	8.3	8	18.7	11.9	1
1336	PE MP3 106 P	PE-P	P	PE MP3	2	7.3	6	21.9	12.3	1
1535	PE MP3 106 P	PE-P	P	PE MP3	2	8.9	13	23.4	22.6	1
391	PE MP3 106 P	PE-P	P	PE MP3	1	7.5	7			0
406	PE MP3 118 P	PE-P	P	PE MP3	1	7.6	10			0
1131	PE MP3 118 P	PE-P	P	PE MP3	2	5.8	9			0
1138	PE MP3 118 P	PE-P	P	PE MP3	2	5.9	11.5	7.8	11.6	1
1187	PE MP3 118 P	PE-P	P	PE MP3	2	6.3	11	27.8	19	1
178	PE MP3 118 P	PE-P	P	PE MP3	1	5.3	8			0
424	PE MP3 118 P	PE-P	P	PE MP3	1	7.7	9			0
1057	PE MP3 119 P	PE-P	P	PE MP3	2	4.9	8			0
159	PE MP3 121 H	PE-H	H	PE MP3	1	4.9	10			0
420	PE MP3 121 H	PE-H	H	PE MP3	1	7.7	7.5			0
589	PE MP3 121 H	PE-H	H	PE MP3	1	11.8	9			0
1047	PE MP3 121 H	PE-H	H	PE MP3	2	4.8	8			0
1460	PE MP3 121 H	PE-H	H	PE MP3	2	8.1	9			0
434	PE MP3 121 H	PE-H	H	PE MP3	1	7.8	10.5	21.844	17.1	1
1280	PE MP3 121 H	PE-H	H	PE MP3	2	6.9	15	23.6	26.9	1
1419	PE MP3 121 H	PE-H	H	PE MP3	2	7.8	13	8.6	12.7	1
1522	PE MP3 121 H	PE-H	H	PE MP3	2	8.8	9.2	19.1	35.1	1
1309	PE MP3 121 H	PE-H	H	PE MP3	2	7.1	9			0
373	PE MP3 121 H	PE-H	H	PE MP3	1	7.4	15			0
172	PE MP3 127 H	PE-H	H	PE MP3	1	5.2	6			0
591	PE MP3 127 H	PE-H	H	PE MP3	1	12	8			0
1219	PE MP3 127 H	PE-H	H	PE MP3	2	6.5	7	19.2	8.8	1
1384	PE MP3 127 H	PE-H	H	PE MP3	2	7.6	12	32.4	25.7	1
1420	PE MP3 127 H	PE-H	H	PE MP3	2	7.8	8.5	24.4	19	1
1449	PE MP3 127 H	PE-H	H	PE MP3	2	8.1	10	44.9	13.3	1
204	PE MP3 127 H	PE-H	H	PE MP3	1	5.8	4			0
1148	PE MP3 15 P	PE-P	P	PE MP3	2	6	10			0
422	PE MP3 16 P	PE-P	P	PE MP3	1	7.7	9			0
1108	PE MP3 16 P	PE-P	P	PE MP3	2	5.6	7.5			0
1447	PE MP3 16 P	PE-P	P	PE MP3	2	8	10			0
205	PE MP3 16 P	PE-P	P	PE MP3	1	5.8	10	22.098	13	1
556	PE MP3 16 P	PE-P	P	PE MP3	1	9.9	5	16.002	5.4	1
1366	PE MP3 16 P	PE-P	P	PE MP3	2	7.5	8.5	31	20.2	1
1461	PE MP3 16 P	PE-P	P	PE MP3	2	8.1	10	23.1	7.2	1
1481	PE MP3 16 P	PE-P	P	PE MP3	2	8.3	6	20.2	9.3	1
1504	PE MP3 16 P	PE-P	P	PE MP3	2	8.6	8	22.9	14.2	1
1557	PE MP3 16 P	PE-P	P	PE MP3	2	9.3	10	25.7	74	1
1623	PE MP3 16 P	PE-P	P	PE MP3	2	10.9	10	24.5	14.2	1
1100	PE MP3 16 P	PE-P	P	PE MP3	2	5.5	9			0
1101	PE MP3 180 P	PE-P	P	PE MP3	2	5.5	8			0
270	PE MP3 19 H	PE-H	H	PE MP3	1	6.6	15			0
359	PE MP3 19 H	PE-H	H	PE MP3	1	7.3	7			0
456	PE MP3 19 H	PE-H	H	PE MP3	1	8.1	10			0
1102	PE MP3 19 H	PE-H	H	PE MP3	2	5.5	7			0
1085	PE MP3 19 H	PE-H	H	PE MP3	2	5.3	4	35	62	1
1281	PE MP3 19 H	PE-H	H	PE MP3	2	6.9	10	30.4	23.2	1
1367	PE MP3 19 H	PE-H	H	PE MP3	2	7.5	7	17.2	12.2	1
1385	PE MP3 19 H	PE-H	H	PE MP3	2	7.6	7	39.3	15.4	1
1624	PE MP3 19 H	PE-H	H	PE MP3	2	11	9.5	36.8	10.3	1
1437	PE MP3 19 P	PE-P	P	PE MP3	2	7.9	11.5	26.9	20.2	1
1392	PE MP3 22 P	PE-P	P	PE MP3	2	7.7	7			0
1548	PE MP3 24 H	PE-H	H	PE MP3	2	9.2	7	30.9	14	1
1337	PE MP3 26 H	PE-H	H	PE MP3	2	7.3	10	22.8	17.4	1
1265	PE MP3 27 H	PE-H	H	PE MP3	2	6.8	7	20	11.4	1
3	PE MP3 28 H	PA-P	P	PE MP3	1	4.9	6			0
367	PE MP3 28 H	PE-H	H	PE MP3	1	7.4	12			0
243	PE MP3 28 H	PE-H	H	PE MP3	1	6.4	15.5	21	16	1
416	PE MP3 28 H	PE-H	H	PE MP3	1	7.7	11	7.1	8.2	1
427	PE MP3 28 H	PE-H	H	PE MP3	1	7.7	9	19	14.4	1
449	PE MP3 28 H	PE-H	H	PE MP3	1	8	13	20.4	14.1	1
1030	PE MP3 28 H	PE-H	H	PE MP3	2	3.9	8	26.9	15.2	1
1325	PE MP3 28 H	PE-H	H	PE MP3	2	7.2	14	9.9	15	1
226	PE MP3 31 H	PE-H	H	PE MP3	1	6.3	6			0
264	PE MP3 31 H	PE-H	H	PE MP3	1	6.5	5			0
356	PE MP3 31 H	PE-H	H	PE MP3	1	7.3	10			0
511	PE MP3 31 H	PE-H	H	PE MP3	1	8.9	11			0
249	PE MP3 31 H	PE-H	H	PE MP3	1	6.5	5	17.8	11.9	1
310	PE MP3 31 H	PE-H	H	PE MP3	1	6.9	16	32.258	14.224	1
1220	PE MP3 31 H	PE-H	H	PE MP3	2	6.5	8	24.6	21	1
1236	PE MP3 31 H	PE-H	H	PE MP3	2	6.6	8	25.6	12.4	1
2004	PE MP3 31 H	PT-H	H	PE MP3	2	9.6	9.5	21.7	22	1
262	PE MP3 34 H	PE-H	H	PE MP3	1	6.5	5			0
314	PE MP3 34 H	PE-H	H	PE MP3	1	6.9	15			0
344	PE MP3 34 H	PE-H	H	PE MP3	1	7.2	12			0
455	PE MP3 34 H	PE-H	H	PE MP3	1	8.1	9			0
462	PE MP3 34 H	PE-H	H	PE MP3	1	8.2	5			0
1023	PE MP3 34 H	PE-H	H	PE MP3	2	2.7	3			0
1390	PE MP3 34 H	PE-H	H	PE MP3	2	7.6	10			0
476	PE MP3 34 H	PE-H	H	PE MP3	1	8.4	10.6	25.2	26.2	1
519	PE MP3 34 H	PE-H	H	PE MP3	1	9.2	9	12.3	19	1
1188	PE MP3 34 H	PE-H	H	PE MP3	2	6.3	12	15.9	10.4	1
1326	PE MP3 34 H	PE-H	H	PE MP3	2	7.2	8	26.7	29.8	1
161	PE MP3 4 H	PE-H	H	PE MP3	1	4.9	6			0
166	PE MP3 4 H	PE-H	H	PE MP3	1	5.1	10			0
407	PE MP3 4 H	PE-H	H	PE MP3	1	7.6	7			0
540	PE MP3 4 H	PE-H	H	PE MP3	1	9.4	7			0
1221	PE MP3 4 H	PE-H	H	PE MP3	2	6.5	10	22	27.5	1
1354	PE MP3 4 H	PE-H	H	PE MP3	2	7.4	9	30.3	26.4	1
1438	PE MP3 4 H	PE-H	H	PE MP3	2	7.9	6	17	10.3	1
515	PE MP3 4 H	PE-H	H	PE MP3	1	9	8			0
509	PE MP3 4 P	PE-P	P	PE MP3	1	8.9	3			0
1625	PE MP3 4 P	PE-P	P	PE MP3	2	11	13.5			0
142	PE MP3 40 H	PE-H	H	PE MP3	1	2.7	3			0
292	PE MP3 40 H	PE-H	H	PE MP3	1	6.7	10			0
436	PE MP3 40 H	PE-H	H	PE MP3	1	7.8	8.5			0
1591	PE MP3 40 H	PE-H	H	PE MP3	2	9.9	5	23.4	13.4	1
501	PE MP3 40 H	PE-H	H	PE MP3	1	8.8	10			0
1513	PE MP3 40 H	PE-H	H	PE MP3	2	8.7	10			0
272	PE MP3 49 P	PE-P	P	PE MP3	1	6.6	7			0
553	PE MP3 49 P	PE-P	P	PE MP3	1	9.9	12			0
169	PE MP3 49 P	PE-P	P	PE MP3	1	5.2	6	32.258	11.43	1
1118	PE MP3 49 P	PE-P	P	PE MP3	2	5.7	11	19.6	29.8	1
1558	PE MP3 49 P	PE-P	P	PE MP3	2	9.3	5	28.6	14.1	1
1630	PE MP3 49 P	PE-P	P	PE MP3	2	11.5	14	26.2	19.3	1
1632	PE MP3 49 P	PE-P	P	PE MP3	2	11.5	14	20.9	18.8	1
1637	PE MP3 49 P	PE-P	P	PE MP3	2	12	12.3	30.4	19	1
207	PE MP3 49 P	PE-P	P	PE MP3	1	5.8	10			0
543	PE MP3 49 P	PE-P	P	PE MP3	1	9.4	15			0
1237	PE MP3 58 H	PE-H	H	PE MP3	2	6.6	7			0
1170	PE MP3 61 P	PE-P	P	PE MP3	2	6.2	13			0
1266	PE MP3 61 P	PE-P	P	PE MP3	2	6.8	8			0
1306	PE MP3 61 P	PE-P	P	PE MP3	2	7.1	10			0
1490	PE MP3 61 P	PE-P	P	PE MP3	2	8.4	9			0
334	PE MP3 61 P	PE-P	P	PE MP3	1	7	5	22.8	16.9	1
521	PE MP3 61 P	PE-P	P	PE MP3	1	9.2	4	22.8	5.6	1
1086	PE MP3 61 P	PE-P	P	PE MP3	2	5.3	7	13.2	11.6	1
1189	PE MP3 61 P	PE-P	P	PE MP3	2	6.3	10	30.3	26.9	1
1421	PE MP3 61 P	PE-P	P	PE MP3	2	7.8	13	16	14.5	1
411	PE MP3 61 P	PE-P	P	PE MP3	1	7.6	12	21.3	17	1
1171	PE MP3 61 P	PE-P	P	PE MP3	2	6.2	4			0
423	PE MP3 64 H	PE-H	H	PE MP3	1	7.7	11.5			0
534	PE MP3 64 H	PE-H	H	PE MP3	1	9.3	8			0
290	PE MP3 67 P	PE-P	P	PE MP3	1	6.7	10			0
433	PE MP3 67 P	PE-P	P	PE MP3	1	7.8	13			0
1592	PE MP3 67 P	PE-P	P	PE MP3	2	9.9	9			0
432	PE MP3 67 P	PE-P	P	PE MP3	1	7.8	14	22.9	15.8	1
1132	PE MP3 67 P	PE-P	P	PE MP3	2	5.8	10	16.7	12.7	1
1559	PE MP3 67 P	PE-P	P	PE MP3	2	9.3	10	16	15	1
414	PE MP3 67M P	PE-P	P	PE MP3	1	7.7	9	17.7	7.1	1
1267	PE MP3 69 H	PE-H	H	PE MP3	2	6.8	11			0
1628	PE MP3 7 H	PE-H	H	PE MP3	2	11.1	6	22.9	16.7	1
1139	PE MP3 7 P	PE-P	P	PE MP3	2	5.9	14			0
1514	PE MP3 7 P	PE-P	P	PE MP3	2	8.7	17			0
377	PE MP3 7 P	PE-P	P	PE MP3	1	7.4	14	13.1	22.6	1
471	PE MP3 7 P	PE-P	P	PE MP3	1	8.3	8	12.8	10.3	1
1041	PE MP3 7 P	PE-P	P	PE MP3	2	4.6	4	26.6	23.6	1
1268	PE MP3 7 P	PE-P	P	PE MP3	2	6.8	11	32.6	27.6	1
1572	PE MP3 7 P	PE-P	P	PE MP3	2	9.5	13.5	26.1	18.9	1
282	PE MP3 7 P	PE-P	P	PE MP3	1	6.6	6			0
1338	PE MP3 70 P	PE-P	P	PE MP3	2	7.3	9			0
352	PE MP3 70 P	PE-P	P	PE MP3	1	7.2	10	19.3	15.8	1
529	PE MP3 70 P	PE-P	P	PE MP3	1	9.3	8	20.06	13.4	1
214	PE MP3 70 P	PE-P	P	PE MP3	1	6	7.5	22.4	26.7	1
160	PE MP3 73 P	PE-P	P	PE MP3	1	4.9	4			0
564	PE MP3 73 P	PE-P	P	PE MP3	1	9.9	8.5			0
322	PE MP3 73 P	PE-P	P	PE MP3	1	6.9	16	16.2	13.5	1
1064	PE MP3 73 P	PE-P	P	PE MP3	2	5	6	25.1	16.8	1
1074	PE MP3 73 P	PE-P	P	PE MP3	2	5.2	8			0
1982	PE MP3 73 P	PT-P	P	PE MP3	2	7.8	9			0
1631	PE MP3 79 P	PE-P	P	PE MP3	2	11.5	10	28.3	14.8	1
1109	PE MP3 8 H	PE-H	H	PE MP3	2	5.6	7			0
1097	PE MP3 88 H	PE-H	H	PE MP3	2	5.5	8	19.5	16.6	1
387	PE MP3 88 H	PE-H	H	PE MP3	1	7.5	11			0
1223	PE MP3 88 H	PE-H	H	PE MP3	2	6.5	5			0
1505	PE MP3 88 H	PE-H	H	PE MP3	2	8.6	11			0
500	PE MP3 88 H	PE-H	H	PE MP3	1	8.8	7	25.3	96.3	1
1222	PE MP3 88 H	PE-H	H	PE MP3	2	6.5	5	18.7	7	1
1471	PE MP3 88 H	PE-H	H	PE MP3	2	8.2	5	33.8	13.9	1
1549	PE MP3 88 H	PE-H	H	PE MP3	2	9.2	9	29	22.3	1
480	PE MP4 106 P	PE-P	P	PE MP4	1	8.4	6			0
1424	PE MP4 91 P	PE-P	P	PE MP4	2	7.8	12	24.4	21.6	1
1201	PE MP4 P	PE-P	P	PE MP4	2	6.4	8.5			0
428	PE MP4 06 P	PE-P	P	PE MP4	1	7.7	14	17.1	10.6	1
1439	PE MP4 1 P	PE-P	P	PE MP4	2	8	7			0
223	PE MP4 10 H	PE-H	H	PE MP4	1	6.1	13			0
445	PE MP4 10 H	PE-H	H	PE MP4	1	8	8			0
1149	PE MP4 100 P	PE-P	P	PE MP4	2	6	8			0
1172	PE MP4 100 P	PE-P	P	PE MP4	2	6.2	12			0
263	PE MP4 100 P	PE-P	P	PE MP4	1	6.5	7	28.9	11.8	1
1368	PE MP4 100 P	PE-P	P	PE MP4	2	7.5	11	21.5	22	1
1605	PE MP4 100 P	PE-P	P	PE MP4	2	10.1	11	29.8	23.4	1
1157	PE MP4 100 P	PE-P	P	PE MP4	2	6.1	15			0
183	PE MP4 100 P	PE-P	P	PE MP4	1	5.4	9	14.5	13	1
190	PE MP4 100 P	PE-P	P	PE MP4	1	5.5	11	22.3	19	1
1282	PE MP4 100 P	PE-P	P	PE MP4	2	6.9	6	13.3	13.4	1
2016	PE MP4 100 P	PT-P	P	PE MP4	2	12.4	6	27.3	11	1
426	PE MP4 103 H	PE-H	H	PE MP4	1	7.7	11			0
1515	PE MP4 104 P	PE-P	P	PE MP4	2	8.7	9	24.3	23.9	1
447	PE MP4 106 P	PE-P	P	PE MP4	1	8	13			0
415	PE MP4 106 P	PE-P	P	PE MP4	1	7.7	10	30.2	21	1
1369	PE MP4 106 P	PE-P	P	PE MP4	2	7.5	7	25	22	1
235	PE MP4 109 ïP	PE-P	P	PE MP4	1	6.3	12			0
1525	PE MP4 109 P	PE-P	P	PE MP4	2	8.9	3	35.7	37.8	1
293	PE MP4 109 P	PE-P	P	PE MP4	1	6.7	12			0
566	PE MP4 109 P	PE-P	P	PE MP4	1	9.9	6			0
1058	PE MP4 109 P	PE-P	P	PE MP4	2	4.9	9.5			0
1140	PE MP4 109 P	PE-P	P	PE MP4	2	5.9	10			0
1249	PE MP4 109 P	PE-P	P	PE MP4	2	6.7	11			0
1173	PE MP4 109 P	PE-P	P	PE MP4	2	6.2	10	7.8	10.1	1
1370	PE MP4 109 P	PE-P	P	PE MP4	2	7.5	14	25.8	19.5	1
1422	PE MP4 109 P	PE-P	P	PE MP4	2	7.8	14	21	28	1
1606	PE MP4 109 P	PE-P	P	PE MP4	2	10.1	14	24.5	17.4	1
302	PE MP4 118	PE-H	H	PE MP4	1	6.8	12			0
523	PE MP4 118 H	PE-H	H	PE MP4	1	9.2	4			0
1068	PE MP4 118 H	PE-H	H	PE MP4	2	5.1	10			0
366	PE MP4 118 H	PE-H	H	PE MP4	1	7.4	14	9.8	8	1
563	PE MP4 118 H	PE-H	H	PE MP4	1	9.9	11	32.2	25.6	1
1283	PE MP4 118 H	PE-H	H	PE MP4	2	6.9	10	19.5	17.3	1
1405	PE MP4 118 H	PE-H	H	PE MP4	2	7.7	13	23.6	17.2	1
1523	PE MP4 118 H	PE-H	H	PE MP4	2	8.8	9.2	14.9	9.2	1
470	PE MP4 121 H	PE-H	H	PE MP4	1	8.3	11			0
1423	PE MP4 121 H	PE-H	H	PE MP4	2	7.8	7			0
200	PE MP4 121 H	PE-H	H	PE MP4	1	5.7	14	18.3	7.4	1
1386	PE MP4 121 H	PE-H	H	PE MP4	2	7.6	12	14.2	16.1	1
1496	PE MP4 121 H	PE-H	H	PE MP4	2	8.5	15	26.5	18.2	1
1110	PE MP4 124 P	PE-P	P	PE MP4	2	5.6	7			0
552	PE MP4 13 H	PE-H	H	PE MP4	1	9.8	14	20.8	11.6	1
1567	PE MP4 13 H	PE-H	H	PE MP4	2	9.4	5	28.9	7	1
1298	PE MP4 13 P	PE-P	P	PE MP4	2	7	7			0
285	PE MP4 130 H	PE-H	H	PE MP4	1	6.7	7			0
312	PE MP4 130 H	PE-H	H	PE MP4	1	6.9	10			0
429	PE MP4 130 H	PE-H	H	PE MP4	1	7.7	13			0
1482	PE MP4 130 H	PE-H	H	PE MP4	2	8.3	8			0
1506	PE MP4 130 H	PE-H	H	PE MP4	2	8.6	8			0
265	PE MP4 130 H	PE-H	H	PE MP4	1	6.5	5	13.7	17.6	1
1042	PE MP4 130 H	PE-H	H	PE MP4	2	4.6	4	21.6	6.9	1
1045	PE MP4 130 H	PE-H	H	PE MP4	2	4.7	5	38.2	18.3	1
1284	PE MP4 130 H	PE-H	H	PE MP4	2	6.9	10	5.7	20.6	1
1299	PE MP4 130 H	PE-H	H	PE MP4	2	7	8	29.7	20.3	1
1202	PE MP4 16 P	PE-P	P	PE MP4	2	6.4	20	20.4	10.2	1
303	PE MP4 19 H	PE-H	H	PE MP4	1	6.8	6.5			0
221	PE MP4 28 H	PE-H	H	PE MP4	1	6.1	13			0
297	PE MP4 28 H	PE-H	H	PE MP4	1	6.8	6.5			0
514	PE MP4 28 H	PE-H	H	PE MP4	1	9	12			0
296	PE MP4 28 H	PE-H	H	PE MP4	1	6.8	6	25.8064	13.462	1
506	PE MP4 28 H	PE-H	H	PE MP4	1	8.9	13.4	25.6	16	1
1238	PE MP4 28 H	PE-H	H	PE MP4	2	6.6	9	27.1	23.4	1
1250	PE MP4 28 H	PE-H	H	PE MP4	2	6.7	13	31.6	22.7	1
1251	PE MP4 28 H	PE-H	H	PE MP4	2	6.7	12	14.7	15.9	1
1252	PE MP4 28 H	PE-H	H	PE MP4	2	6.7	10	18	16.2	1
1462	PE MP4 28 H	PE-H	H	PE MP4	2	8.1	10	31	18	1
1224	PE MP4 28 H	PE-H	H	PE MP4	2	6.5	11	19.8	17	1
1593	PE MP4 28 H	PE-H	H	PE MP4	2	9.9	12	30.6	18	1
477	PE MP4 3 H	PE-H	H	PE MP4	1	8.4	11			0
493	PE MP4 31 H	PE-H	H	PE MP4	1	8.7	11			0
164	PE MP4 40 H	PE-H	H	PE MP4	1	5	5			0
165	PE MP4 40 H	PE-H	H	PE MP4	1	5	5			0
239	PE MP4 40 H	PE-H	H	PE MP4	1	6.4	8			0
244	PE MP4 40 H	PE-H	H	PE MP4	1	6.4	10			0
1240	PE MP4 40 H	PE-H	H	PE MP4	2	6.6	15			0
1536	PE MP4 40 H	PE-H	H	PE MP4	2	8.9	4			0
224	PE MP4 40 H	PE-H	H	PE MP4	1	6.2	11.6	10.1	19	1
1239	PE MP4 40 H	PE-H	H	PE MP4	2	6.6	7	22.8	13.1	1
1472	PE MP4 40 H	PE-H	H	PE MP4	2	8.2	5	23.8	15.1	1
1560	PE MP4 40 H	PE-H	H	PE MP4	2	9.3	11	14.6	13.9	1
1581	PE MP4 40 H	PE-H	H	PE MP4	2	9.8	14	37.6	24.3	1
1075	PE MP4 43 H	PE-H	H	PE MP4	2	5.2	8			0
1601	PE MP4 43 H	PE-H	H	PE MP4	2	10	8			0
309	PE MP4 43 H	PE-H	H	PE MP4	1	6.9	10	18.7	13.2	1
1119	PE MP4 43 H	PE-H	H	PE MP4	2	5.7	8	26.8	9.4	1
1203	PE MP4 43 H	PE-H	H	PE MP4	2	6.4	8	25.5	11.6	1
1225	PE MP4 43 H	PE-H	H	PE MP4	2	6.5	5	18.2	11.1	1
1645	PE MP4 43 H	PE-H	H	PE MP4	2	12.9	7	34.9	9.9	1
380	PE MP4 43 H	PE-H	H	PE MP4	1	7.4	15			0
1307	PE MP4 46 P	PE-P	P	PE MP4	2	7.1	11	20.1	17.8	1
1164	PE MP4 46 P	PE-P	P	PE MP4	2	6.2	11.6	22.4	19.8	1
329	PE MP4 46 P	PE-P	P	PE MP4	1	7	10			0
444	PE MP4 46 P	PE-P	P	PE MP4	1	8	6			0
502	PE MP4 46 P	PE-P	P	PE MP4	1	8.8	9.2			0
1026	PE MP4 46 P	PE-P	P	PE MP4	2	3.5	21			0
1150	PE MP4 46 P	PE-P	P	PE MP4	2	6	6			0
1473	PE MP4 46 P	PE-P	P	PE MP4	2	8.2	9			0
1046	PE MP4 46 P	PE-P	P	PE MP4	2	4.7	11	18.6	37	1
1048	PE MP4 46 P	PE-P	P	PE MP4	2	4.8	10	24.7	15.3	1
1174	PE MP4 46 P	PE-P	P	PE MP4	2	6.2	14	17.78	28.7	1
337	PE MP4 46 P	PE-P	P	PE MP4	1	7.1	6			0
405	PE MP4 46 P	PE-P	P	PE MP4	1	7.6	12			0
1035	PE MP4 46 P	PE-P	P	PE MP4	2	4.2	8			0
1175	PE MP4 46 P	PE-P	P	PE MP4	2	6.2	12	30	15.2	1
1573	PE MP4 46 P	PE-P	P	PE MP4	2	9.5	8	46	12	1
1120	PE MP4 48 H	PE-H	H	PE MP4	2	5.7	5			0
541	PE MP4 49 H	PE-H	H	PE MP4	1	9.4	15			0
1024	PE MP4 49 H	PE-H	H	PE MP4	2	2.7	3			0
1121	PE MP4 49 H	PE-H	H	PE MP4	2	5.7	12	30.7	9	1
1226	PE MP4 49 H	PE-H	H	PE MP4	2	6.5	5	19.7	7.9	1
1094	PE MP4 5 H	PE-H	H	PE MP4	2	5.4	7	26.7	17.5	1
179	PE MP4 52 H	PE-H	H	PE MP4	1	5.4	10			0
318	PE MP4 52 H	PE-H	H	PE MP4	1	6.9	10			0
375	PE MP4 52 H	PE-H	H	PE MP4	1	7.4	9			0
1308	PE MP4 52 H	PE-H	H	PE MP4	2	7.1	6			0
369	PE MP4 52 H	PE-H	H	PE MP4	1	7.4	15	23.6	15	1
1300	PE MP4 52 H	PE-H	H	PE MP4	2	7	9	27.2	17.9	1
300	PE MP4 52 H	PE-H	H	PE MP4	1	6.8	12			0
1078	PE MP4 55 H	PE-H	H	PE MP4	2	5.3	13	17	13	1
250	PE MP4 55 H	PE-H	H	PE MP4	1	6.5	8			0
275	PE MP4 55 H	PE-H	H	PE MP4	1	6.6	6			0
382	PE MP4 55 H	PE-H	H	PE MP4	1	7.5	7			0
486	PE MP4 55 H	PE-H	H	PE MP4	1	8.6	8			0
1406	PE MP4 55 H	PE-H	H	PE MP4	2	7.7	11			0
1095	PE MP4 55 H	PE-H	H	PE MP4	2	5.4	14	21.1	21.3	1
1190	PE MP4 55 H	PE-H	H	PE MP4	2	6.3	12	26.8	35.7	1
355	PE MP4 58	PE-P	P	PE MP4	1	7.2	8			0
144	PE MP4 58 P	PE-P	P	PE MP4	1	3.8	15			0
1241	PE MP4 58 P	PE-P	P	PE MP4	2	6.6	13			0
363	PE MP4 58 P	PE-P	P	PE MP4	1	7.4	9	10.6	14	1
482	PE MP4 58 P	PE-P	P	PE MP4	1	8.4	10.6			0
1540	PE MP4 58 P	PE-P	P	PE MP4	2	9	14	11.3	13.8	1
289	PE MP4 6 P	PE-P	P	PE MP4	1	6.7	10	8.7	22.5	1
331	PE MP4 61 P	PE-P	P	PE MP4	1	7	11			0
1285	PE MP4 61 P	PE-P	P	PE MP4	2	6.9	6.5			0
1620	PE MP4 61 P	PE-P	P	PE MP4	2	10.8	11	29.3	24.1	1
2006	PE MP4 61 P	PE-P	P	PE MP4	2	9.9	10.6			0
168	PE MP4 61 P	PE-P	P	PE MP4	1	5.1	10			0
353	PE MP4 61 P	PE-P	P	PE MP4	1	7.2	7	21.3	35.6	1
1076	PE MP4 61 P	PE-P	P	PE MP4	2	5.2	10	22.6	11.7	1
197	PE MP4 64 H	PE-H	H	PE MP4	1	5.7	14			0
481	PE MP4 64 H	PE-H	H	PE MP4	1	8.4	10.6			0
1407	PE MP4 64 H	PE-H	H	PE MP4	2	7.7	11			0
453	PE MP4 64 H	PE-H	H	PE MP4	1	8.1	5	18.7	12.9	1
1491	PE MP4 7 P	PE-P	P	PE MP4	2	8.4	11			0
1541	PE MP4 7 P	PE-P	P	PE MP4	2	9	8			0
1158	PE MP4 7 P	PE-P	P	PE MP4	2	6.1	7.5	29.8	20.2	1
1204	PE MP4 7 P	PE-P	P	PE MP4	2	6.4	6	32.9	24.6	1
1639	PE MP4 7 P	PE-P	P	PE MP4	2	12.1	7	28.9	23.4	1
274	PE MP4 7 P	PE-P	P	PE MP4	1	6.6	9			0
1371	PE MP4 7 P	PE-P	P	PE MP4	2	7.5	10	24.9	12.4	1
1492	PE MP4 7 P	PE-P	P	PE MP4	2	8.4	11	30.8	9.8	1
291	PE MP4 70 H	PE-H	H	PE MP4	1	6.7	10			0
503	PE MP4 70 H	PE-H	H	PE MP4	1	8.9	3			0
1301	PE MP4 70 H	PE-H	H	PE MP4	2	7	5			0
1355	PE MP4 70 H	PE-H	H	PE MP4	2	7.4	12			0
1096	PE MP4 70 H	PE-H	H	PE MP4	2	5.4	14	19	18.8	1
1269	PE MP4 70 H	PE-H	H	PE MP4	2	6.8	16	20.4	19	1
185	PE MP4 73 H	PE-H	H	PE MP4	1	5.5	7			0
1408	PE MP4 73 H	PE-H	H	PE MP4	2	7.7	15	29.8	31.4	1
1176	PE MP4 73 P	PE-P	P	PE MP4	2	6.2	12	26.7	22.5	1
351	PE MP4 73 P	PE-P	P	PE MP4	1	7.2	12	11.6	8.6	1
1133	PE MP4 91 H	PE-H	H	PE MP4	2	5.8	4			0
1122	PE MP4 91 P	PE-P	P	PE MP4	2	5.7	12			0
1448	PE MP4 91 P	PE-P	P	PE MP4	2	8	9			0
1537	PE MP4 91 P	PE-P	P	PE MP4	2	8.9	14			0
1646	PE MP4 91 P	PE-P	P	PE MP4	2	13.9	12			0
1387	PE MP4 91 P	PE-P	P	PE MP4	2	7.6	8	24.7	16.4	1
332	PE MP4 91 P	PE-P	P	PE MP4	1	7	6			0
490	PE MP4 91 P	PE-P	P	PE MP4	1	8.6	8	26.7	12.9	1
546	PE MP4 91 P	PE-P	P	PE MP4	1	9.5	8	20.2	8.2	1
2000	PE MP4 91 P	PT-P	P	PE MP4	2	9	8	23.7	17.4	1
1134	PE MP4 P	PE-P	P	PE MP4	2	5.8	10			0
1474	PE MP4 P	PE-P	P	PE MP4	2	8.2	13			0
1497	PE MP4 P	PE-P	P	PE MP4	2	8.5	8			0
277	PE MP4 P	PE-P	P	PE MP4	1	6.6	15	34.3	13.2	1
280	PE MP4 P	PE-P	P	PE MP4	1	6.6	6	9.8	28.7	1
527	PE MP4 P	PE-P	P	PE MP4	1	9.2	9	29.2	18.5	1
1388	PE MP4 P	PE-P	P	PE MP4	2	7.6	7	24.9	15.3	1
410	PE MP4 P	PE-P	P	PE MP4	1	7.6	7			0
1714	PL M 1 H	PL-H	H	PL M	2	11.8	9			0
1670	PL M 1 H	PL-H	H	PL M	2	5.1	22			0
1661	PL M 10 H	PL-H	H	PL M	2	4.4	16			0
825	PL M 10 P	PL-P	P	PL M	1	4.6	4			0
829	PL M 10 P	PL-P	P	PL M	1	5.7	11			0
836	PL M 10 P	PL-P	P	PL M	1	6.3	9			0
845	PL M 10 P	PL-P	P	PL M	1	7.4	12			0
846	PL M 10 P	PL-P	P	PL M	1	7.6	14			0
859	PL M 10 P	PL-P	P	PL M	1	8.9	11			0
1708	PL M 10 P	PL-P	P	PL M	2	9.4	26			0
854	PL M 10 P	PL-P	P	PL M	1	8.1	10	29.3	45.5	1
1696	PL M 10 P	PL-P	P	PL M	2	7.8	14	19.1	47.3	1
857	PL M 10 P	PL-P	P	PL M	1	8.2	9.9			0
1680	PL M 103 H	PL-H	H	PL M	2	6.5	19.5			0
1662	PL M 103 H	PL-H	H	PL M	2	4.4	25	11.6	32	1
1677	PL M 103 H	PL-H	H	PL M	2	5.8	18	13.8	25.4	1
1701	PL M 103 H	PL-H	H	PL M	2	8.5	20	15.9	33.2	1
1690	PL M 103 H	PL-H	H	PL M	2	7.3	10			0
840	PL M 103 P	PL-P	P	PL M	1	6.8	11			0
839	PL M 106 H	PL-H	H	PL M	1	6.7	7			0
1692	PL M 112 P	PL-P	P	PL M	2	7.4	14	29.2	33	1
848	PL M 118 H	PL-H	H	PL M	1	7.7	7.5			0
1705	PL M 118 H	PL-H	H	PL M	2	9.1	28	23.7	50.8	1
1702	PL M 16 P	PL-P	P	PL M	2	8.7	17			0
1672	PL M 27 P	PL-P	P	PL M	2	5.2	20			0
832	PL M 37 H	PL-H	H	PL M	1	5.7	5			0
1686	PL M 37 H	PL-H	H	PL M	2	6.7	22	12.8	25.2	1
827	PL M 4 H	PL-H	H	PL M	1	5.3	15.6			0
1673	PL M 4 H	PL-H	H	PL M	2	5.5	18.5			0
1679	PL M 4 H	PL-H	H	PL M	2	5.9	25			0
1681	PL M 4 H	PL-H	H	PL M	2	6.5	8			0
1717	PL M 4 H	PL-H	H	PL M	2	15.5	5			0
851	PL M 4 H	PL-H	H	PL M	1	7.8	13	24.5	31	1
862	PL M 40 P	PL-P	P	PL M	1	9.9	14			0
1652	PL M 40 P	PL-P	P	PL M	2	3.7	14.5			0
1715	PL M 40 P	PL-P	P	PL M	2	12.9	7			0
837	PL M 46 P	PL-P	P	PL M	1	6.5	5	16.6	22.6	1
1704	PL M 46 P	PL-P	P	PL M	2	8.9	13.4	26.5	31.8	1
1700	PL M 46 P	PL-P	P	PL M	2	8.3	8			0
831	PL M 52 H	PL-H	H	PL M	1	5.7	5			0
833	PL M 52 H	PL-H	H	PL M	1	5.7	5			0
1709	PL M 52 H	PL-H	H	PL M	2	10.3	27	28.4	42.7	1
856	PL M 52 H	PL-H	H	PL M	1	8.2	25	28.7	45	1
838	PL M 64 H	PL-H	H	PL M	1	6.6	6			0
847	PL M 64 H	PL-H	H	PL M	1	7.6	8			0
1655	PL M 64 H	PL-H	H	PL M	2	4	22			0
865	PL M 64 H	PL-H	H	PL M	1	11	9.5	11.7	28.2	1
1697	PL M 64 H	PL-H	H	PL M	2	7.8	9			0
835	PL M 7 H	PL-H	H	PL M	1	6.2	11.6			0
843	PL M 7 H	PL-H	H	PL M	1	6.9	11			0
861	PL M 7 H	PL-H	H	PL M	1	9.8	14			0
1666	PL M 7 H	PL-H	H	PL M	2	4.6	15			0
1683	PL M 7 H	PL-H	H	PL M	2	6.6	8			0
841	PL M 7 H	PL-H	H	PL M	1	6.9	10	21	30	1
863	PL M 7 H	PL-H	H	PL M	1	10.6	9	14.7	30	1
1687	PL M 7 H	PL-H	H	PL M	2	6.9	19	27.3	36.9	1
1664	PL M 70 H	PL-H	H	PL M	2	4.5	19			0
1653	PL M 70 H	PL-H	H	PL M	2	3.7	12	10.8	35.2	1
1667	PL M 70 H	PL-H	H	PL M	2	4.9	14	18.8	35.4	1
1693	PL M 70 H	PL-H	H	PL M	2	7.5	26	28.3	45.8	1
826	PL M 70 H	PL-H	H	PL M	1	5.2	8	17.3	31.2	1
1657	PL M 70 H	PL-H	H	PL M	2	4.3	13	9.5	26.5	1
828	PL M 73 H	PL-H	H	PL M	1	5.7	8	17.1	20	1
1688	PL M 73 H	PL-H	H	PL M	2	7	9	20	19.4	1
1716	PL M 73 P	PL-P	P	PL M	2	14	18			0
834	PL M 76 H	PL-H	H	PL M	1	5.8	4			0
1651	PL M 76 H	PL-H	H	PL M	2	3.6	12			0
1654	PL M 76 H	PL-H	H	PL M	2	3.8	20			0
1694	PL M 76 H	PL-H	H	PL M	2	7.7	9			0
1703	PL M 76 H	PL-H	H	PL M	2	8.7	8			0
1710	PL M 76 H	PL-H	H	PL M	2	10.4	6			0
1684	PL M 76 H	PL-H	H	PL M	2	6.6	21.5	18	30	1
1699	PL M 76 H	PL-H	H	PL M	2	7.9	16	26.9	22	1
1712	PL M 76 H	PL-H	H	PL M	2	11.3	23	20.5	35	1
1695	PL M 76 H	PL-H	H	PL M	2	7.7	14			0
1674	PL M 76 H	PL-H	H	PL M	2	5.5	17			0
1711	PL M 94 H	PL-H	H	PL M	2	10.9	9			0
842	PL TS 1 P	PL-P	P	PL TS	1	6.9	16			0
1663	PL TS 1 P	PL-P	P	PL TS	2	4.4	12	10.6	30	1
858	PL TS 1 P	PL-P	P	PL TS	1	8.8	9.2			0
830	PL TS 127 P	PL-P	P	PL TS	1	5.7	8			0
855	PL TS 127 P	PL-P	P	PL TS	1	8.2	5			0
864	PL TS 28 P	PL-P	P	PL TS	1	10.6	9	18.8	41.2	1
1822	PL TS 28 P	PT-P	P	PL TS	2	5.1	16	17.9	35.2	1
1656	PL TS 4 P	PL-P	P	PL TS	2	4.2	18.5			0
1669	PL TS 4 P	PL-P	P	PL TS	2	5	24	18.7	38.6	1
852	PL TS 40 H	PL-H	H	PL TS	1	7.9	10			0
1682	PL TS 40 H	PL-H	H	PL TS	2	6.5	29	25.2	46.8	1
1658	PL TS 43 P	PL-P	P	PL TS	2	4.3	16	9.4	37.2	1
853	PL TS 46 H	PL-H	H	PL TS	1	7.9	11			0
1707	PL TS 46 H	PL-H	H	PL TS	2	9.3	11			0
1713	PL TS 46 H	PL-H	H	PL TS	2	11.3	16	30	35.1	1
1659	PL TS 52 P	PL-P	P	PL TS	2	4.3	16			0
849	PL TS 85 P	PL-P	P	PL TS	1	7.7	15			0
860	PL TS 88 P	PL-P	P	PL TS	1	8.9	13.4			0
1665	PL TS 88 P	PL-P	P	PL TS	2	4.5	13			0
1676	PL TS 88 P	PL-P	P	PL TS	2	5.6	18			0
850	PL TS 88 P	PL-P	P	PL TS	1	7.8	13	25.3	54	1
1650	PL TS 88 P	PL-P	P	PL TS	2	3.4	16	12	32.3	1
1685	PL TS 88 P	PL-P	P	PL TS	2	6.6	19	23.8	22.3	1
1660	PL TS 88P	PL-P	P	PL TS	2	4.3	6	13.8	19.6	1
1671	PL TS 9	PL-H	H	PL TS	2	5.1	16			0
1831	PT AG 106 H	PT-H	H	PT AG	2	5.2	7	18.4	20	1
797	PT AG 106 P	PT-P	P	PT AG	1	9.9	10	12.1	29	1
820	PT AG 112 H	PT-H	H	PT AG	1	12.6	9			0
623	PT AG 118 P	PT-P	P	PT AG	1	5.7	8			0
786	PT AG 118 P	PT-P	P	PT AG	1	9.3	8			0
1983	PT AG 118 P	PT-P	P	PT AG	2	7.8	15			0
1797	PT AG 118 P	PT-P	P	PT AG	2	4.8	11.2	8.9	22.2	1
1726	PT AG 121 H	PT-H	H	PT AG	2	3.4	14			0
1990	PT AG 124 P	PT-P	P	PT AG	2	8.2	14	9.1	19.5	1
609	PT AG 127 P	PT-P	P	PT AG	1	5.2	8			0
1858	PT AG 127 P	PT-P	P	PT AG	2	5.5	13	11.9	51.4	1
636	PT AG 127 P	PT-P	P	PT AG	1	6	16	14.3	30.3	1
619	PT AG 130 H	PT-H	H	PT AG	1	5.5	7			0
666	PT AG 130 H	PT-H	H	PT AG	1	6.7	12			0
1779	PT AG 130 H	PT-H	H	PT AG	2	4.6	17			0
1940	PT AG 130 H	PT-H	H	PT AG	2	6.8	16			0
1977	PT AG 130 H	PT-H	H	PT AG	2	7.7	15			0
1823	PT AG 130 H	PT-H	H	PT AG	2	5.1	15	14	24	1
1851	PT AG 130 H	PT-H	H	PT AG	2	5.4	16	23.3	32.1	1
1939	PT AG 130 H	PT-H	H	PT AG	2	6.8	16	21.5	42	1
1820	PT AG 130 H	PT-H	H	PT AG	2	5.1	6.7	10.9	15	1
1978	PT AG 130 H	PT-H	H	PT AG	2	7.7	9	11.4	25	1
2003	PT AG 130 H	PT-H	H	PT AG	2	9.5	5.3	13.7	28	1
1889	PT AG 130 P	PT-P	P	PT AG	2	6	20			0
1857	PT AG 130 P	PT-P	P	PT AG	2	5.5	20	12.9	30.1	1
1882	PT AG 130 P	PT-P	P	PT AG	2	5.9	18	21.2	30	1
1931	PT AG 14 H	PT-H	H	PT AG	2	6.6	15.5	16.6	34.9	1
1912	PT AG 16 H	PT-H	H	PT AG	2	6.3	14	11.2	22	1
695	PT AG 16 H	PT-H	H	PT AG	1	7.2	8	22.86	28	1
1923	PT AG 16 H	PT-H	H	PT AG	2	6.5	5	26.9	55.6	1
784	PT AG 16 H	PT-H	H	PT AG	1	9.2	4			0
1772	PT AG 16 H	PT-H	H	PT AG	2	4.5	17.1			0
1803	PT AG 19 H	PT-H	H	PT AG	2	4.9	16	16.2	46.9	1
1890	PT AG 19 H	PT-H	H	PT AG	2	6	14	17.9	30	1
1932	PT AG 19 H	PT-H	H	PT AG	2	6.6	19	22.1	52.1	1
1922	PT AG 22 H	PT-H	H	PT AG	2	6.5	20	20.7	40.5	1
1962	PT AG 22 H	PT-H	H	PT AG	2	7.3	20.5	8.7	28.8	1
1976	PT AG 22 H	PT-H	H	PT AG	2	7.7	7.5	13.2	33.8	1
815	PT AG 22 H	PT-H	H	PT AG	1	12.1	9			0
1944	PT AG 22 H	PT-H	H	PT AG	2	6.9	10.5			0
1804	PT AG 22 H	PT-H	H	PT AG	2	4.9	16.5	17.3	23	1
1805	PT AG 22 H	PT-H	H	PT AG	2	4.9	21	16.7	21	1
1865	PT AG 22 H	PT-H	H	PT AG	2	5.6	14	22.6	32	1
1985	PT AG 22 H	PT-H	H	PT AG	2	7.9	12			0
739	PT AG 22 P	PT-P	P	PT AG	1	7.8	7			0
793	PT AG 25 P	PT-P	P	PT AG	1	9.5	11			0
1840	PT AG 25 P	PT-P	P	PT AG	2	5.3	18			0
1991	PT AG 25 P	PT-P	P	PT AG	2	8.2	11			0
606	PT AG 25 P	PT-P	P	PT AG	1	4.9	10	26.3	49.8	1
608	PT AG 25 P	PT-P	P	PT AG	1	4.9	4	24.7	47.6	1
1828	PT AG 28 P	PT-P	P	PT AG	2	5.2	20	26	37.4	1
756	PT AG 28 P	PT-P	P	PT AG	1	8.2	14	16.6	35.2	1
1773	PT AG 28 P	PT-P	P	PT AG	2	4.5	11	10.3	24.3	1
1883	PT AG 33 H	PT-H	H	PT AG	2	5.9	17	9.4	22	1
643	PT AG 34 P	PT-P	P	PT AG	1	6.2	11.6			0
733	PT AG 34 P	PT-P	P	PT AG	1	7.7	14			0
727	PT AG 34 P	PT-P	P	PT AG	1	7.7	13			0
1762	PT AG 34 P	PT-P	P	PT AG	2	4.3	10.9	12	44	1
1872	PT AG 34 P	PT-P	P	PT AG	2	5.7	8	20.3	23.7	1
1963	PT AG 34 P	PT-P	P	PT AG	2	7.3	26	27.2	68.7	1
1839	PT AG 34 P	PT-P	P	PT AG	2	5.3	19			0
1898	PT AG 34 P	PT-P	P	PT AG	2	6.1	13			0
1751	PT AG 34 P	PT-P	P	PT AG	2	4.1	18	13.1	9	1
724	PT AG 37 P	PT-P	P	PT AG	1	7.7	11.5	10	7.8	1
9	PT AG 37 P	PT-P	P	PT AG	1	6.3	12			0
1952	PT AG 37 P	PT-P	P	PT AG	2	7	6			0
715	PT AG 37 P	PT-P	P	PT AG	1	7.6	12			0
1727	PT AG 37 P	PT-P	P	PT AG	2	3.4	10	13.9	25	1
1937	PT AG 39 P	PT-P	P	PT AG	2	6.7	12	13.1	30.7	1
1798	PT AG 40 H	PT-H	H	PT AG	2	4.8	17			0
607	PT AG 43 P	PT-P	P	PT AG	1	4.9	4			0
1746	PT AG 43 P	PT-P	P	PT AG	2	4	20			0
1832	PT AG 43 P	PT-P	P	PT AG	2	5.2	16			0
691	PT AG 43 P	PT-P	P	PT AG	1	7.1	6	15.7	13.6	1
811	PT AG 46 P	PT-P	P	PT AG	1	10.6	9			0
694	PT AG 49 H	PT-H	H	PT AG	1	7.2	9			0
1774	PT AG 49 H	PT-H	H	PT AG	2	4.5	20	10.5	12.8	1
615	PT AG 55 P	PT-P	P	PT AG	1	5.4	14			0
709	PT AG 55 P	PT-P	P	PT AG	1	7.5	8			0
751	PT AG 55 P	PT-P	P	PT AG	1	8	13			0
1780	PT AG 55 P	PT-P	P	PT AG	2	4.6	12	12.7	27.5	1
1781	PT AG 55 P	PT-P	P	PT AG	2	4.6	16	18.9	74	1
1971	PT AG 55 P	PT-P	P	PT AG	2	7.5	12.5	14.4	25.7	1
1924	PT AG 61 P	PT-P	P	PT AG	2	6.5	13	16.2	41.2	1
819	PT AG 61 P	PT-P	P	PT AG	1	12.6	9			0
743	PT AG 67 P	PT-P	P	PT AG	1	7.8	14			0
664	PT AG 67 P	PT-P	P	PT AG	1	6.7	13			0
716	PT AG 7 H	PT-H	H	PT AG	1	7.6	8			0
760	PT AG 7 H	PT-H	H	PT AG	1	8.4	10.6			0
699	PT AG 7 H	PT-H	H	PT AG	1	7.2	7	11.3	32.8	1
734	PT AG 7 H	PT-H	H	PT AG	1	7.7	11	15	40.3	1
1721	PT AG 7 H	PT-H	H	PT AG	2	3.1	13	9.6	30	1
1750	PT AG 7 H	PT-H	H	PT AG	2	4.1	14	9.1	29	1
1833	PT AG 7 H	PT-H	H	PT AG	2	5.2	21	11.7	33.9	1
754	PT AG 7 P	PT-P	P	PT AG	1	8.2	6			0
1771	PT AG 7 P	PT-P	P	PT AG	2	4.5	11			0
1850	PT AG 7 P	PT-P	P	PT AG	2	5.4	12			0
720	PT AG 70 H	PT-H	H	PT AG	1	7.6	7			0
747	PT AG 70 H	PT-H	H	PT AG	1	7.9	11.5			0
1668	PT AG 70 P	PT-P	P	PT AG	2	5	17	10.3	43	1
1787	PT AG 73 H	PT-H	H	PT AG	2	4.7	12	13	17.6	1
1813	PT AG 73 H	PT-H	H	PT AG	2	5	14			0
1799	PT AG 75 H	PT-H	H	PT AG	2	4.8	10	12.8	20.9	1
773	PT AG 76 P	PT-P	P	PT AG	1	8.8	9.2			0
670	PT AG 76 P	PT-P	P	PT AG	1	6.7	10	17.3	24	1
1735	PT AG 76 P	PT-P	P	PT AG	2	3.7	12	12.6	36.3	1
1800	PT AG 76 P	PT-P	P	PT AG	2	4.8	16	24.5	31.7	1
1974	PT AG 76 P	PT-P	P	PT AG	2	7.6	18	21.4	39.4	1
798	PT AG 77 H	PT-H	H	PT AG	1	9.9	14			0
612	PT AG 79 H	PT-H	H	PT AG	1	5.4	9			0
805	PT AG 79 H	PT-H	H	PT AG	1	10	6			0
1678	PT AG 82 P	PT-P	P	PT AG	2	5.9	16	14.6	37	1
758	PT AG 82 P	PT-P	P	PT AG	1	8.2	14			0
790	PT AG 82 P	PT-P	P	PT AG	1	9.4	7			0
822	PT AG 82 P	PT-P	P	PT AG	1	12.9	7			0
1964	PT AG 82 P	PT-P	P	PT AG	2	7.3	10	25	28	1
1986	PT AG 82 P	PT-P	P	PT AG	2	7.9	23	14	38	1
1852	PT AG 82 P	PT-P	P	PT AG	2	5.4	16			0
1925	PT AG 82 P	PT-P	P	PT AG	2	6.5	19	8	33	1
1796	PT AG 88 P	PT-P	P	PT AG	2	4.8	16	14.1	44	1
717	PT AG 88 P	PT-P	P	PT AG	1	7.6	12			0
1933	PT AG 88 P	PT-P	P	PT AG	2	6.6	9			0
676	PT AG 88 P	PT-P	P	PT AG	1	6.8	11	14.3	17.8	1
1744	PT AG 88 P	PT-P	P	PT AG	2	3.9	13	14.9	43	1
1968	PT AG 88 P	PT-P	P	PT AG	2	7.4	6	26.9	49.2	1
688	PT AG 88P	PT-P	P	PT AG	1	7	5			0
603	PT AG 97 H	PT-H	H	PT AG	1	4.1	5.5			0
711	PT AG 97 H	PT-H	H	PT AG	1	7.5	7			0
752	PT AG 97 H	PT-H	H	PT AG	1	8.1	10			0
809	PT AG 97 H	PT-H	H	PT AG	1	10.4	6			0
614	PT AG 97 H	PT-H	H	PT AG	1	5.4	14	14.8	29	1
745	PT AG 97 H	PT-H	H	PT AG	1	7.8	8.5			0
750	PT BA 118 P	PT-P	P	PT BA	1	8	8	19	59	1
1989	PT BA 118 P	PT-P	P	PT BA	2	8.1	28			0
627	PT BA 118 P	PT-P	P	PT BA	1	5.7	14	17.9	59.6	1
1728	PT BA 121 P	PT-P	P	PT BA	2	3.4	8.5	17.4	53.3	1
731	PT BA 124 P	PT-P	P	PT BA	1	7.7	11			0
1722	PT BA 124 P	PT-P	P	PT BA	2	3.1	15	11.3	27.8	1
661	PT BA 127 H	PT-H	H	PT BA	1	6.6	8			0
1979	PT BA 127 H	PT-H	H	PT BA	2	7.7	20	16.3	37.9	1
1834	PT BA 13 P	PT-P	P	PT BA	2	5.2	18			0
1866	PT BA 18 P	PT-P	P	PT BA	2	5.6	5			0
1934	PT BA 37 P	PT-P	P	PT BA	2	6.6	19	21.7	71.9	1
783	PT BA 43 P	PT-P	P	PT BA	1	9.2	4			0
1918	PT BA 43 P	PT-P	P	PT BA	2	6.4	18.5			0
802	PT BA 43 P	PT-P	P	PT BA	1	10	10	8.6	22.1	1
1867	PT BA 58 P	PT-P	P	PT BA	2	5.6	14	9.4	42	1
571	PT BA 61 P	PT-P	P	PT BA	1	10	8			0
1938	PT BA 61 P	PT-P	P	PT BA	2	6.7	7			0
1891	PT BA 61 P	PT-P	P	PT BA	2	6	15	15	31.4	1
1911	PT BA 61 P	PT-P	P	PT BA	2	6.3	13	14.2	36	1
638	PT BA 64 H	PT-H	H	PT BA	1	6.1	13			0
652	PT BA 64 H	PT-H	H	PT BA	1	6.5	8			0
669	PT BA 64 H	PT-H	H	PT BA	1	6.7	13			0
1841	PT BA 64 H	PT-H	H	PT BA	2	5.3	18			0
1806	PT BA 64 H	PT-H	H	PT BA	2	4.9	17	13	42	1
1873	PT BA 64 H	PT-H	H	PT BA	2	5.7	18	19	32	1
1880	PT BA 64 H	PT-H	H	PT BA	2	5.8	19	16.4	35	1
813	PT BA 67 P	PT-P	P	PT BA	1	12	8	30.7	63.4	1
2005	PT BA 71 P	PT-P	P	PT BA	2	9.9	14			0
598	PT BA 73 H	PT-H	H	PT BA	1	2.7	3	10.668	32	1
692	PT BA 77 P	PT-P	P	PT BA	1	7.1	9			0
1737	PT BA 77 P	PT-P	P	PT BA	2	3.8	13	17.2	27.3	1
1747	PT BA 77 P	PT-P	P	PT BA	2	4	10	12.1	24.4	1
1892	PT CR 10 H	PT-H	H	PT CR	2	6	18			0
1946	PT CR 10 H	PT-H	H	PT CR	2	6.9	21			0
2010	PT CR 10 H	PT-H	H	PT CR	2	10.1	15	20.9	28.7	1
656	PT CR 100 H	PT-H	H	PT CR	1	6.6	11.5			0
1945	PT CR 100 H	PT-H	H	PT CR	2	6.9	28			0
785	PT CR 100 H	PT-H	H	PT CR	1	9.3	8			0
1997	PT CR 100 H	PT-H	H	PT CR	2	8.7	16			0
1814	PT CR 100 H	PT-H	H	PT CR	2	5	13	16.3	38.1	1
1899	PT CR 100 H	PT-H	H	PT CR	2	6.1	19	28.1	16.9	1
1959	PT CR 100 H	PT-H	H	PT CR	2	7.2	9	27.6	55.8	1
1821	PT CR 100 H	PT-H	H	PT CR	2	5.1	10	9.4	17.4	1
792	PT CR 121 H	PT-H	H	PT CR	1	9.4	7			0
728	PT CR 124 H	PT-H	H	PT CR	1	7.7	7.5	18.1	42	1
1913	PT CR 124 H	PT-H	H	PT CR	2	6.3	20	22.1	34.4	1
1763	PT CR 13 H	PT-H	H	PT CR	2	4.3	16	16.7	11	1
1853	PT CR 13 H	PT-H	H	PT CR	2	5.4	20.5	6.9	26	1
1752	PT CR 13 H	PT-H	H	PT CR	2	4.1	4			0
1926	PT CR 13 H	PT-H	H	PT CR	2	6.5	18			0
812	PT CR 16 H	PT-H	H	PT CR	1	11.1	6	7.4	14	1
806	PT CR 22 H	PT-H	H	PT CR	1	10.1	15	6.4	33	1
1884	PT CR 22 H	PT-H	H	PT CR	2	5.9	15	17.7	41	1
800	PT CR 31 H	PT-H	H	PT CR	1	9.9	11	12.446	18	1
801	PT CR 31 H	PT-H	H	PT CR	1	9.9	6	19.9	40.1	1
1788	PT CR 31 H	PT-H	H	PT CR	2	4.7	19	11.8	15.4	1
1919	PT CR 31 H	PT-H	H	PT CR	2	6.4	19	11.4	16	1
630	PT CR 34 H	PT-H	H	PT CR	1	5.8	10			0
1764	PT CR 4 H	PT-H	H	PT CR	2	4.3	11			0
1801	PT CR 4 H	PT-H	H	PT CR	2	4.8	12	16.6	32	1
1893	PT CR 4 H	PT-H	H	PT CR	2	6	11.5	21.3	13.2	1
1947	PT CR 42 H	PT-H	H	PT CR	2	6.9	12	9.3	19	1
671	PT CR 43 H	PT-H	H	PT CR	1	6.7	7			0
659	PT CR 43 H	PT-H	H	PT CR	1	6.6	15			0
1894	PT CR 43 H	PT-H	H	PT CR	2	6	14			0
1394	PT CR 43 H	PE-H	H	PT CR	2	7.7	14	10.5	23.9	1
2001	PT CR 49 H	PT-H	H	PT CR	2	9.1	14			0
1859	PT CR 49 H	PT-H	H	PT CR	2	5.5	16	18.7	36	1
622	PT CR 55 H	PT-H	H	PT CR	1	5.5	11	25.4	58	1
1972	PT CR 7 H	PT-H	H	PT CR	2	7.5	8			0
723	PT CR 7 H	PT-H	H	PT CR	1	7.7	14	20	57	1
1860	PT CR 7 H	PT-H	H	PT CR	2	5.5	16	8.7	36	1
1888	PT CR 7 H	PT-H	H	PT CR	2	6	16	7.4	24	1
1904	PT CR 7 H	PT-H	H	PT CR	2	6.2	10	19.2	41	1
1769	PT CR 76 H	PT-H	H	PT CR	2	4.4	11			0
672	PT CR 76 H	PT-H	H	PT CR	1	6.8	6.5			0
1736	PT CR 76 H	PT-H	H	PT CR	2	3.7	10			0
1980	PT CR 76 H	PT-H	H	PT CR	2	7.7	17	26.7	48.3	1
2014	PT CR 76 H	PT-H	H	PT CR	2	11.3	14.9	16	30	1
667	PT CR 76 H	PT-H	H	PT CR	1	6.7	7			0
657	PT CR 8 H	PT-H	H	PT CR	1	6.6	9			0
2019	PT CR 97 H	PT-H	H	PT CR	2	15.2	17	23	20.2	1
1941	PT CR 97 H	PT-H	H	PT CR	2	6.8	19			0
1815	PT CR 97 H	PT-H	H	PT CR	2	5	16	8.6	24.3	1
1816	PT CR 97 H	PT-H	H	PT CR	2	5	18	9.5	22.3	1
796	PT CR 97 H	PT-H	H	PT CR	1	9.8	14			0
808	PT MC 46 P	PT-P	P	PT MC	1	10.4	6			0
2018	PT MC 127 P	PT-P	P	PT MC	2	15.1	12.9			0
1807	PT TI 43 P	PT-P	P	PT TI	2	4.9	6			0
705	PT MC 121 P	PT-P	P	PT MC	1	7.3	10			0
1738	PT MC 121 P	PT-P	P	PT MC	2	3.8	14			0
1817	PT MC 121 P	PT-P	P	PT MC	2	5	12			0
1905	PT MC 121 P	PT-P	P	PT MC	2	6.2	19	18.2	38.2	1
1718	PT MC 121 P	PT-P	P	PT MC	2	1.9	10			0
1960	PT MC 121 P	PT-P	P	PT MC	2	7.2	22	12	37	1
1961	PT MC 121 P	PT-P	P	PT MC	2	7.2	12	22.8	68.4	1
1765	PT MC 121 P	PT-P	P	PT MC	2	4.3	13			0
611	PT MC 124 P	PT-P	P	PT MC	1	5.3	5			0
1789	PT MC 124 P	PT-P	P	PT MC	2	4.7	16			0
1881	PT MC 124 P	PT-P	P	PT MC	2	5.8	20	17.9	14.2	1
804	PT MC 127 H	PT-H	H	PT MC	1	10	8			0
687	PT MC 19 H	PT-H	H	PT MC	1	7	9			0
613	PT MC 25 H	PT-H	H	PT MC	1	5.4	14			0
780	PT MC 25 H	PT-H	H	PT MC	1	1	12	4.8	17.8	1
597	PT MC 4 P	PT-P	P	PT MC	1	2.7	3			0
696	PT MC 52 P	PT-P	P	PT MC	1	7.2	8			0
776	PT MC 52 P	PT-P	P	PT MC	1	8.9	3			0
1753	PT MC 52 P	PT-P	P	PT MC	2	4.1	9			0
1935	PT MC 52 P	PT-P	P	PT MC	2	6.6	7	18.1	51.6	1
1843	PT MC 55 H	PT-H	H	PT MC	2	5.3	12	19.2	17.3	1
665	PT MC 58 P	PT-P	P	PT MC	1	6.7	13			0
810	PT MC 58 P	PT-P	P	PT MC	1	10.4	13			0
1999	PT MC 58 P	PT-P	P	PT MC	2	8.9	4			0
714	PT MC 58 P	PT-P	P	PT MC	1	7.6	10	19	32	1
718	PT MC 76 P	PT-P	P	PT MC	1	7.6	12			0
655	PT MC 85 H	PT-H	H	PT MC	1	6.6	7			0
730	PT MC A P	PT-P	P	PT MC	1	7.7	15			0
763	PT O 1 P	PT-P	P	PT O	1	8.5	12	20.3	34.5	1
1782	PT O 1 P	PT-P	P	PT O	2	4.6	9	21	47.5	1
1900	PT O 1 P	PT-P	P	PT O	2	6.1	22	14.3	41	1
1844	PT O 106 H	PT-H	H	PT O	2	5.3	15			0
642	PT O 109 H	PT-H	H	PT O	1	6.1	13			0
678	PT O 109 H	PT-H	H	PT O	1	6.8	12			0
1829	PT O 115 P	PT-P	P	PT O	2	5.2	19.9	12.1	31	1
1824	PT O 115 P	PT-P	P	PT O	2	5.1	21			0
1927	PT O 16 P	PT-P	P	PT O	2	6.5	6			0
604	PT O 19 H	PT-H	H	PT O	1	4.7	5			0
605	PT O 19 H	PT-H	H	PT O	1	4.8	8			0
779	PT O 34 H	PT-H	H	PT O	1	8.9	11			0
1808	PT O 34 H	PT-H	H	PT O	2	4.9	18			0
1901	PT O 34 H	PT-H	H	PT O	2	6.1	16			0
1914	PT O 34 H	PT-H	H	PT O	2	6.3	18			0
2015	PT O 34 H	PT-H	H	PT O	2	11.7	11			0
824	PT O 34 H	PT-H	H	PT O	1	12.9	7	11.7	34.4	1
1770	PT O 34 H	PT-H	H	PT O	2	4.4	13	9.7	25.1	1
645	PT O 37 H	PT-H	H	PT O	1	6.4	10	18.7	47	1
1756	PT O 37 H	PT-H	H	PT O	2	4.2	13			0
684	PT O 37 H	PT-H	H	PT O	1	6.9	10			0
789	PT O 37 H	PT-H	H	PT O	1	9.4	15			0
1965	PT O 37 H	PT-H	H	PT O	2	7.3	20	9.5	30	1
663	PT O 37 H	PT-H	H	PT O	1	6.7	10	14.3	24.4	1
1783	PT O 38 H	PT-H	H	PT O	2	4.6	15			0
689	PT O 38 H	PT-H	H	PT O	1	7	10	13.9	24	1
1874	PT O 39 H	PT-H	H	PT O	2	5.7	21	25.5	46	1
637	PT O 4 H	PT-H	H	PT O	1	6.1	13			0
639	PT O 4 H	PT-H	H	PT O	1	6.1	13			0
1875	PT O 4 H	PT-H	H	PT O	2	5.7	19			0
1723	PT O 46 P	PT-P	P	PT O	2	3.2	8			0
788	PT O 46 P	PT-P	P	PT O	1	9.4	5			0
1739	PT O 49 H	PT-H	H	PT O	2	3.8	13	9.3	23.2	1
1917	PT O 49 H	PT-H	H	PT O	2	6.4	16	18.4	28	1
644	PT O 55 H	PT-H	H	PT O	1	6.3	9			0
738	PT O 55 H	PT-H	H	PT O	1	7.8	8.5			0
1809	PT O 55 H	PT-H	H	PT O	2	4.9	24			0
1969	PT O 55 H	PT-H	H	PT O	2	7.4	10			0
662	PT O 55 H	PT-H	H	PT O	1	6.6	15	26.5	52	1
725	PT O 55 H	PT-H	H	PT O	1	7.7	13	13.6	30	1
1757	PT O 55 H	PT-H	H	PT O	2	4.2	12	10.14	46.6	1
1766	PT O 55 H	PT-H	H	PT O	2	4.3	11	21.3	29.4	1
675	PT O 61 H	PT-H	H	PT O	1	6.8	6			0
701	PT O 61 H	PT-H	H	PT O	1	7.2	14			0
708	PT O 61 H	PT-H	H	PT O	1	7.4	12			0
1854	PT O 61 H	PT-H	H	PT O	2	5.4	16			0
621	PT O 67 H	PT-H	H	PT O	1	5.5	11			0
651	PT O 67 H	PT-H	H	PT O	1	6.5	13			0
732	PT O 67 H	PT-H	H	PT O	1	7.7	11			0
641	PT O 76 H	PT-H	H	PT O	1	6.1	4.5			0
729	PT O 76 H	PT-H	H	PT O	1	7.7	9			0
823	PT O 76 H	PT-H	H	PT O	1	12.9	7			0
1876	PT O 76 H	PT-H	H	PT O	2	5.7	14			0
1915	PT O 76 H	PT-H	H	PT O	2	6.3	6			0
1877	PT O 76 H	PT-H	H	PT O	2	5.7	9	18.4	25.2	1
1970	PT O 76 H	PT-H	H	PT O	2	7.4	12	19.1	35.7	1
1810	PT O 9 H	PT-H	H	PT O	2	4.9	12	19.8	40	1
1830	PT O 91 P	PT-P	P	PT O	2	5.2	16	12.4	32.2	1
1724	PT O 91 P	PT-P	P	PT O	2	3.2	11			0
1740	PT O 91 P	PT-P	P	PT O	2	3.8	18			0
1956	PT O 91 P	PT-P	P	PT O	2	7.1	15	20.9	39.1	1
712	PT O 91 P	PT-P	P	PT O	1	7.5	8	12.7	26.8	1
1885	PT P 61 H	PT-H	H	PT P	2	5.9	16			0
1818	PT P 105 P	PT-P	P	PT P	2	5	20			0
628	PT P 11P	PT-P	P	PT P	1	5.7	14			0
1786	PT P 14 P	PT-P	P	PT P	2	4.7	12			0
1649	PT P 51	PT-P	P	PT P	2	3.1	20.5	25.2	45.5	1
1942	PT P 61 H	PT-H	H	PT P	2	6.8	23	15.4	58	1
1861	PT P 67 P	PT-P	P	PT P	2	5.5	16			0
1725	PT P 67 P	PT-P	P	PT P	2	3.2	7	15.3	31.9	1
772	PT P 67 P	PT-P	P	PT P	1	8.8	9.2			0
631	PT P GI 82 P	PT-P	P	PT P	1	5.8	10			0
654	PT PA 10 H	PT-H	H	PT PA	1	6.6	6			0
775	PT PA 10 H	PT-H	H	PT PA	1	8.9	4	13.8	36	1
774	PT PA 103 H	PT-H	H	PT PA	1	8.8	7	17.4	40.6	1
1754	PT PA 103 H	PT-H	H	PT PA	2	4.1	16	17.5	42	1
1948	PT PA 103 H	PT-H	H	PT PA	2	6.9	10	17	34.4	1
765	PT PA 106 P	PT-P	P	PT PA	1	8.6	11			0
1758	PT PA 106 P	PT-P	P	PT PA	2	4.2	10	14.4	39.9	1
1748	PT PA 11 H	PT-H	H	PT PA	2	4	7	11.4	22.4	1
1868	PT PA 112 H	PT-H	H	PT PA	2	5.6	16			0
713	PT PA 112 H	PT-H	H	PT PA	1	7.6	9.9	25.2	62.2	1
1845	PT PA 112 H	PT-H	H	PT PA	2	5.3	19			0
1975	PT PA 113 H	PT-H	H	PT PA	2	7.6	8			0
706	PT PA 124 P	PT-P	P	PT PA	1	7.3	10			0
1811	PT PA 124 P	PT-P	P	PT PA	2	4.9	12			0
787	PT PA 124 P	PT-P	P	PT PA	1	9.3	11			0
737	PT PA 127 H	PT-H	H	PT PA	1	7.7	13			0
1795	PT PA 127 P	PT-P	P	PT PA	2	4.8	19			0
1957	PT PA 13 H	PT-H	H	PT PA	2	7.1	6			0
2013	PT PA 13 H	PT-H	H	PT PA	2	11	9.5			0
1741	PT PA 13 P	PT-P	P	PT PA	2	3.8	13			0
599	PT PA 13 P	PT-P	P	PT PA	1	3.8	15	15.6	27.8	1
1790	PT PA 13 P	PT-P	P	PT PA	2	4.7	30	21.6	37.2	1
1819	PT PA 13 P	PT-P	P	PT PA	2	5	25.3			0
682	PT PA 16 H	PT-H	H	PT PA	1	6.9	10			0
771	PT PA 16 H	PT-H	H	PT PA	1	8.8	10			0
818	PT PA 16 H	PT-H	H	PT PA	1	12.6	9			0
2007	PT PA 16 H	PT-H	H	PT PA	2	9.9	10.5			0
1730	PT PA 16 H	PT-H	H	PT PA	2	3.6	12	16.6	42.8	1
1855	PT PA 16 H	PT-H	H	PT PA	2	5.4	18	12.3	33.6	1
1755	PT PA 22 P	PT-P	P	PT PA	2	4.1	14	24.4	56	1
1791	PT PA 27 P	PT-P	P	PT PA	2	4.7	21	29.1	81	1
719	PT PA 34 H	PT-H	H	PT PA	1	7.6	9.9			0
1731	PT PA 37 P	PT-P	P	PT PA	2	3.6	12			0
721	PT PA 43 H	PT-H	H	PT PA	1	7.6	9.9	22.6	42.3	1
757	PT PA 43 H	PT-H	H	PT PA	1	8.2	9.9	25.9	46.9	1
610	PT PA 58 H	PT-H	H	PT PA	1	5.3	5			0
698	PT PA 61 P	PT-P	P	PT PA	1	7.2	8			0
736	PT PA 64 H	PT-H	H	PT PA	1	7.7	11			0
685	PT PA 64 H	PT-H	H	PT PA	1	6.9	10	18.2	30.6	1
693	PT PA 64 H	PT-H	H	PT PA	1	7.2	10	15.5	26	1
1846	PT PA 64 H	PT-H	H	PT PA	2	5.3	15.6	26.2	38.9	1
1761	PT PA 73 P	PT-P	P	PT PA	2	4.3	15	7.8	21	1
1928	PT PA 77 P	PT-P	P	PT PA	2	6.5	11			0
632	PT PA 91 H	PT-H	H	PT PA	1	6	9			0
1847	PT PA 94 H	PT-H	H	PT PA	2	5.3	13			0
1825	PT PA 94 H	PT-H	H	PT PA	2	5.1	21	13.8	35.5	1
1992	PT PA 94 H	PT-H	H	PT PA	2	8.3	7.2	16.9	18.2	1
1862	PT SE 22 H	PT-H	H	PT SE	2	5.5	21			0
1759	PT SE 10 H	PT-H	H	PT SE	2	4.2	17	7.2	45.6	1
649	PT SE 100 H	PT-H	H	PT SE	1	6.4	8	13.4	38	1
707	PT SE 109 H	PT-H	H	PT SE	1	7.3	7			0
1775	PT SE 109 H	PT-H	H	PT SE	2	4.5	14			0
1835	PT SE 109 H	PT-H	H	PT SE	2	5.2	6			0
1895	PT SE 109 H	PT-H	H	PT SE	2	6	16			0
1988	PT SE 113 H	PT-H	H	PT SE	2	8	13	21.9	50.8	1
782	PT SE 121 H	PT-H	H	PT SE	1	9.2	4			0
803	PT SE 121 H	PT-H	H	PT SE	1	10	8			0
814	PT SE 127 H	PT-H	H	PT SE	1	12	8			0
1896	PT SE 127 H	PT-H	H	PT SE	2	6	16	15.5	17.4	1
658	PT SE 13 H	PT-H	H	PT SE	1	6.6	6			0
1863	PT SE 13 H	PT-H	H	PT SE	2	5.5	15.5	15.8	22.2	1
1906	PT SE 16 H	PT-H	H	PT SE	2	6.2	18			0
735	PT SE 16 H	PT-H	H	PT SE	1	7.7	10	18.6	21.9	1
1729	PT SE 16 H	PT-H	H	PT SE	2	3.4	17	21.3	47.2	1
1993	PT SE 16 H	PT-H	H	PT SE	2	8.4	10.6	23.6	16.1	1
1984	PT SE 16 H	PT-H	H	PT SE	2	7.8	18			0
1953	PT SE 16 H	PT-H	H	PT SE	2	7	15	13.3	29.8	1
626	PT SE 17 H	PT-H	H	PT SE	1	5.7	8	21.5	15.2	1
791	PT SE 22 H	PT-H	H	PT SE	1	9.4	7			0
1776	PT SE 22 H	PT-H	H	PT SE	2	4.5	20	10.1	27	1
1958	PT SE 22 H	PT-H	H	PT SE	2	7.1	25	16.7	51.3	1
769	PT SE 25 H	PT-H	H	PT SE	1	8.8	9.2	22.5	58.4	1
1848	PT SE 25 H	PT-H	H	PT SE	2	5.3	14	23.2	43.8	1
1864	PT SE 25 H	PT-H	H	PT SE	2	5.5	18.5	8.5	23.2	1
1994	PT SE 25 H	PT-H	H	PT SE	2	8.4	6	23.2	37.4	1
1954	PT SE 28 H	PT-H	H	PT SE	2	7	8			0
1886	PT SE 28 H	PT-H	H	PT SE	2	5.9	11	13.3	22.1	1
1936	PT SE 28 H	PT-H	H	PT SE	2	6.6	11	20.3	29.7	1
2012	PT SE 28 H	PT-H	H	PT SE	2	10.6	9	22.7	24.2	1
1836	PT SE 31 H	PT-H	H	PT SE	2	5.2	16	17.4	36.7	1
660	PT SE 34 H	PT-H	H	PT SE	1	6.6	7			0
795	PT SE 34 H	PT-H	H	PT SE	1	9.6	9.5	26.9	42	1
1949	PT SE 34 H	PT-H	H	PT SE	2	6.9	10	26.2	33.4	1
1827	PT SE 34 H	PT-H	H	PT SE	2	5.2	16	15.3	42.5	1
650	PT SE 37 H	PT-H	H	PT SE	1	6.5	5			0
777	PT SE 37 H	PT-H	H	PT SE	1	8.9	10			0
646	PT SE 46 H	PT-H	H	PT SE	1	6.4	10	12	23.4	1
710	PT SE 46 H	PT-H	H	PT SE	1	7.5	8	12.7	41.1	1
600	PT SE 47 H	PT-H	H	PT SE	1	3.8	15			0
1916	PT SE 55 H	PT-H	H	PT SE	2	6.3	12			0
1907	PT SE 57 H	PT-H	H	PT SE	2	6.2	13			0
635	PT SE 61 37	PT-H	H	PT SE	1	6	9			0
697	PT SE 61 H	PT-H	H	PT SE	1	7.2	8			0
1733	PT SE 61 H	PT-H	H	PT SE	2	3.7	13			0
1777	PT SE 61 H	PT-H	H	PT SE	2	4.5	9			0
1869	PT SE 61 H	PT-H	H	PT SE	2	5.6	15.7	11.6	36	1
1768	PT SE 67 H	PT-H	H	PT SE	2	4.4	9	19.3	38.9	1
700	PT SE 7 H	PT-H	H	PT SE	1	7.2	9	18.1	44	1
683	PT SE 70 H	PT-H	H	PT SE	1	6.9	11			0
1749	PT SE 70 H	PT-H	H	PT SE	2	4	13			0
1792	PT SE 70 H	PT-H	H	PT SE	2	4.7	10	27.4	32.2	1
1887	PT SE 70 H	PT-H	H	PT SE	2	5.9	10	13	30	1
620	PT SE 76 H	PT-H	H	PT SE	1	5.5	8			0
674	PT SE 76 H	PT-H	H	PT SE	1	6.8	12	7.5	24.6	1
1842	PT SE 76 P	PT-P	P	PT SE	2	5.3	19			0
1778	PT SE 82 H	PT-H	H	PT SE	2	4.5	13			0
1784	PT SE 82 H	PT-H	H	PT SE	2	4.6	16			0
2011	PT SE 82 H	PT-H	H	PT SE	2	10.4	13			0
1826	PT SE 82 H	PT-H	H	PT SE	2	5.1	19	33.6	35.2	1
1908	PT SE 82 H	PT-H	H	PT SE	2	6.2	19	17.1	25.8	1
1902	PT SE 84 H	PT-H	H	PT SE	2	6.1	26	17	47	1
27	PT SE 88 P	PT-H	H	PT SE	1	7.9	11.5			0
753	PT SE 91 H	PT-H	H	PT SE	1	8.1	5			0
781	PT SE 94 H	PT-H	H	PT SE	1	9.2	4			0
1793	PT SE 94 H	PT-H	H	PT SE	2	4.7	13			0
749	PT SE 94 H	PT-H	H	PT SE	1	7.9	17	14	23	1
617	PT SE 97 H	PT-H	H	PT SE	1	5.4	14			0
686	PT SE 97 H	PT-H	H	PT SE	1	7	6	9.9	17.6	1
1897	PT SE 97 H	PT-H	H	PT SE	2	6	21	21.1	49.6	1
778	PT SE GI 37 P	PT-P	P	PT SE	1	8.9	4			0
1745	PT SE 100 H	PT-H	H	PT SE	2	3.9	8			0
703	PT SE 100 H	PT-H	H	PT SE	1	7.2	9	19.6	30	1
744	PT SE 24 H	PT-H	H	PT SE	1	7.8	8.5			0
1943	PT TI 1 P	PT-P	P	PT TI	2	6.8	7			0
2009	PT TI 1 P	PT-P	P	PT TI	2	10	6	20.4	27.2	1
759	PT TI 103 H	PT-H	H	PT TI	1	8.2	14	11.3	48.1	1
1802	PT TI 105 H	PT-H	H	PT TI	2	4.8	13			0
624	PT TI 109 P	PT-P	P	PT TI	1	5.7	14	12.1	29	1
1903	PT TI 109 P	PT-P	P	PT TI	2	6.1	19	14.6	30	1
746	PT TI 112 P	PT-P	P	PT TI	1	7.9	6	15.494	37	1
768	PT TI 112 P	PT-P	P	PT TI	1	8.8	10	10.7	48.6	1
1719	PT TI 115 P	PT-P	P	PT TI	2	2.3	11	13.8	12.1	1
1929	PT TI 115 P	PT-P	P	PT TI	2	6.5	10	17.8	48.2	1
653	PT TI 115 P	PT-P	P	PT TI	1	6.5	7			0
1742	PT TI 118 H	PT-H	H	PT TI	2	3.8	13			0
625	PT TI 118 H	PT-H	H	PT TI	1	5.7	11	17.3	30	1
629	PT TI 118 H	PT-H	H	PT TI	1	5.8	10	6	13.3	1
1837	PT TI 118 H	PT-H	H	PT TI	2	5.2	12	25.1	39	1
742	PT TI 12 P	PT-P	P	PT TI	1	7.8	13			0
1921	PT TI 124 P	PT-P	P	PT TI	2	6.5	21	15.3	45.2	1
677	PT TI 124 P	PT-P	P	PT TI	1	6.8	11	14	52	1
748	PT TI 124 P	PT-P	P	PT TI	1	7.9	10	15.3	50.8	1
1838	PT TI 124 P	PT-P	P	PT TI	2	5.2	20	7.8	28.4	1
2017	PT TI 124 P	PT-P	P	PT TI	2	15	12.1	24.9	35.6	1
640	PT TI 127 P	PT-P	P	PT TI	1	6.1	13			0
764	PT TI 127 P	PT-P	P	PT TI	1	8.6	11			0
1732	PT TI 127 P	PT-P	P	PT TI	2	3.6	13	15.7	38	1
673	PT TI 130 H	PT-H	H	PT TI	1	6.8	7			0
1812	PT TI 130 H	PT-H	H	PT TI	2	4.9	22	17.7	38.2	1
1794	PT TI 130 H	PT-H	H	PT TI	2	4.7	16	8.7	24	1
1996	PT TI 146 P	PT-P	P	PT TI	2	8.5	16	14.9	41.2	1
679	PT TI 154 P	PT-P	P	PT TI	1	6.8	11			0
1760	PT TI 16 H	PT-H	H	PT TI	2	4.2	6	20.9	30	1
702	PT TI 170 P	PT-P	P	PT TI	1	7.2	8			0
964	PT TI 18 H	PT-H	H	PT TI	2	5.8	17			0
1950	PT TI 19 P	PT-P	P	PT TI	2	6.9	11			0
726	PT TI 22 P	PT-P	P	PT TI	1	7.7	11			0
807	PT TI 22 P	PT-P	P	PT TI	1	10.1	15			0
1767	PT TI 32 P	PT-P	P	PT TI	2	4.3	9	16.7	37	1
1909	PT TI 34 H	PT-H	H	PT TI	2	6.2	20.4			0
2002	PT TI 34 P	PT-P	P	PT TI	2	9.3	11			0
648	PT TI 34 P	PT-P	P	PT TI	1	6.4	8	15	41	1
2008	PT TI 34 P	PT-P	P	PT TI	2	9.9	6	19.2	37.3	1
1955	PT TI 4 P	PT-P	P	PT TI	2	7	19			0
1998	PT TI 4 P	PT-P	P	PT TI	2	8.7	10			0
1981	PT TI 4 P	PT-P	P	PT TI	2	7.7	11.5	8.1	22.9	1
616	PT TI 40 H	PT-H	H	PT TI	1	5.4	14			0
634	PT TI 40 H	PT-H	H	PT TI	1	6	16			0
681	PT TI 40 H	PT-H	H	PT TI	1	6.9	10	19.8	27.6	1
722	PT TI 40 H	PT-H	H	PT TI	1	7.6	10	18	35.9	1
1930	PT TI 40 H	PT-H	H	PT TI	2	6.5	5	28	10.8	1
601	PT TI 43 P	PT-P	P	PT TI	1	3.9	8			0
618	PT TI 43 P	PT-P	P	PT TI	1	5.5	8			0
680	PT TI 43 P	PT-P	P	PT TI	1	6.9	10			0
755	PT TI 43 P	PT-P	P	PT TI	1	8.2	5			0
602	PT TI 52 H	PT-H	H	PT TI	1	4.1	5.5			0
1785	PT TI 52 H	PT-H	H	PT TI	2	4.6	18	15	32.8	1
1856	PT TI 52 H	PT-H	H	PT TI	2	5.4	14.5	12.7	24	1
766	PT TI 52 H	PT-H	H	PT TI	1	8.6	13			0
794	PT TI 52 H	PT-H	H	PT TI	1	9.5	8	15.8	39	1
799	PT TI 52 H	PT-H	H	PT TI	1	9.9	11	15.8	33	1
1734	PT TI 54 P	PT-P	P	PT TI	2	3.7	17	4.4	17.5	1
1910	PT TI 54 P	PT-P	P	PT TI	2	6.2	15			0
1870	PT TI 54 P	PT-P	P	PT TI	2	5.6	9.5	17	25	1
1871	PT TI 54 P	PT-P	P	PT TI	2	5.6	21	20.4	47.2	1
704	PT TI 54 P	PT-P	P	PT TI	1	7.2	7			0
1966	PT TI 62 H	PT-H	H	PT TI	2	7.3	16	24.1	54.5	1
668	PT TI 64 H	PT-H	H	PT TI	1	6.7	10			0
767	PT TI 64 H	PT-H	H	PT TI	1	8.6	13			0
770	PT TI 64 H	PT-H	H	PT TI	1	8.8	7			0
[truncated: 8 more rows]
